# Supplementary material for: Long-read genome assemblies reveal a cis-regulatory landscape associated with phenotypic divergence in two sister Siniperca fish species
Source: PubMed Central journal article supplement — Zool Res. 2023 Mar 18;44(2):287–302. doi: 10.24272/j.issn.2095-8137.2022.462 (PMC10083227; doi:10.24272/j.issn.2095-8137.2022.462), 2023-03-18
Supplement: zr-44-287-S1.pdf [file zr-44-287-S1.pdf]

## Supplementary Materials

### **Long-read genome assemblies reveal a *cis*-regulatory landscape associated with phenotypic divergence in two sister *Siniperca* fish species**

Guang-Xian Tu<sup>1,2</sup>, Xin-Shuang Zhang<sup>3</sup>, Rui-Run Jiang<sup>1,2</sup>, Long Zhang<sup>1,2</sup>, Cheng-Jun Lai<sup>1,2</sup>, Zhu-Yue Yan<sup>1,2</sup>, Yan-Rong Lv<sup>1,2</sup>, Shao-Ping Weng<sup>1,2,4</sup>, Li Zhang<sup>3</sup>, Jian-Guo He<sup>1,2,4,\*</sup>, Muhua Wang<sup>1,2,4,\*</sup>

<sup>1</sup>State Key Laboratory for Biocontrol, School of Marine Sciences, Sun Yat-Sen University, Zhuhai, Guangdong 519000, China

<sup>2</sup>China-ASEAN Belt and Road Joint Laboratory on Mariculture Technology, Southern Marine Science and Engineering Guangdong Laboratory (Zhuhai), Zhuhai, Guangdong 519000, China

<sup>3</sup>Chinese Institute for Brain Research, Beijing 102206, China

<sup>4</sup>Guangdong Province Key Laboratory for Aquatic Economic Animals, School of Life Sciences, Sun Yat-sen University, Guangzhou, Guangdong 510275, China

\*Corresponding authors, E-mail: lsshjg@mail.sysu.edu.cn; wangmuh@mail.sysu.edu.cn

A

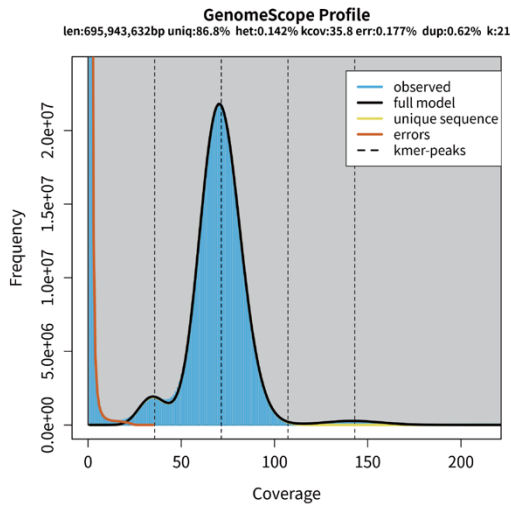

B

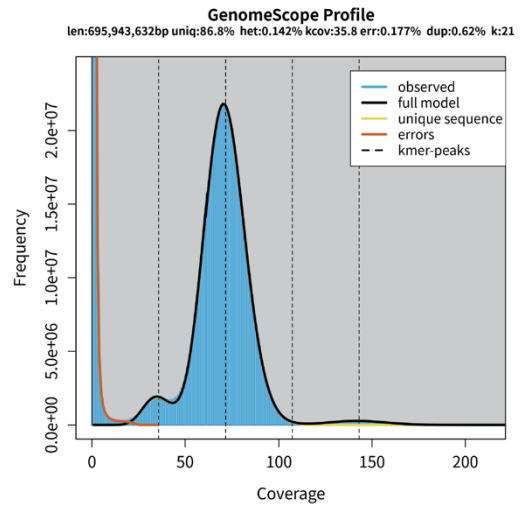

**Supplementary Figure S1 Distribution of 21-mer frequency in *S. chuatsi* (A) and *S. scherzeri* (B) genomes**

Sizes of *S. chuatsi* and *S. scherzeri* genomes were estimated at 695.9 Mb and 708.4 Mb, respectively. Heterozygous rates of *S. chuatsi* and *S. scherzeri* genomes were estimated at 0.142% and 0.231%, respectively. (len: haploid length; uniq: percentage non-repetitive sequence; het: percentage estimated heterozygosity; kcov: average *k*-mer coverage for heterozygous bases; err: percentage sequencing error rate; dup: mean read duplication rate; k: *k*-mer size).

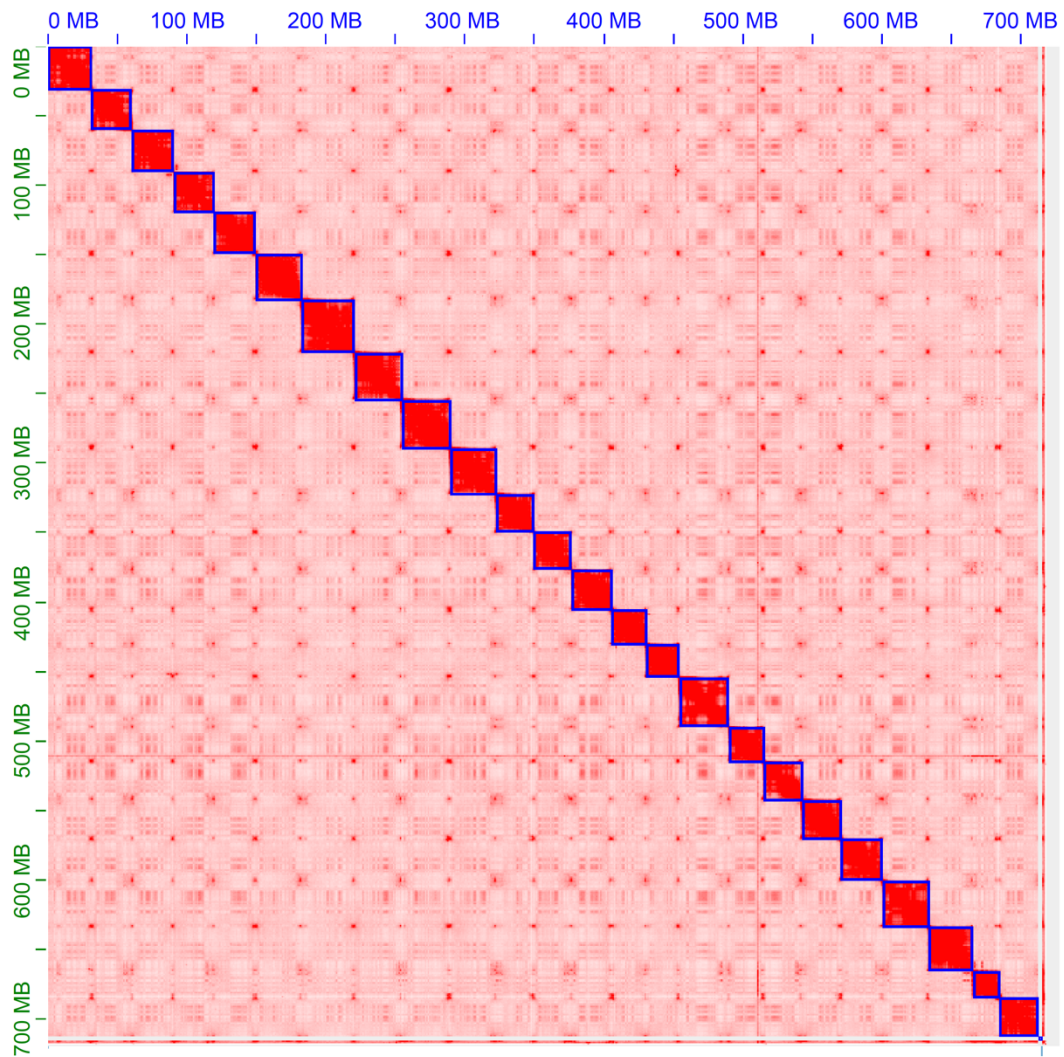

**Supplementary Figure S2 Hi-C interaction matrix for assembled *S. chuatsi* scaffolds generated using Juicebox Hi-C visualization**

Darker colors indicate higher frequency of chromatin interactions. Plot shows clear separation of chromosomal boundaries (blue rectangles) and limited off-diagonal interactions, supporting global structure of chromosome-scale scaffolds.

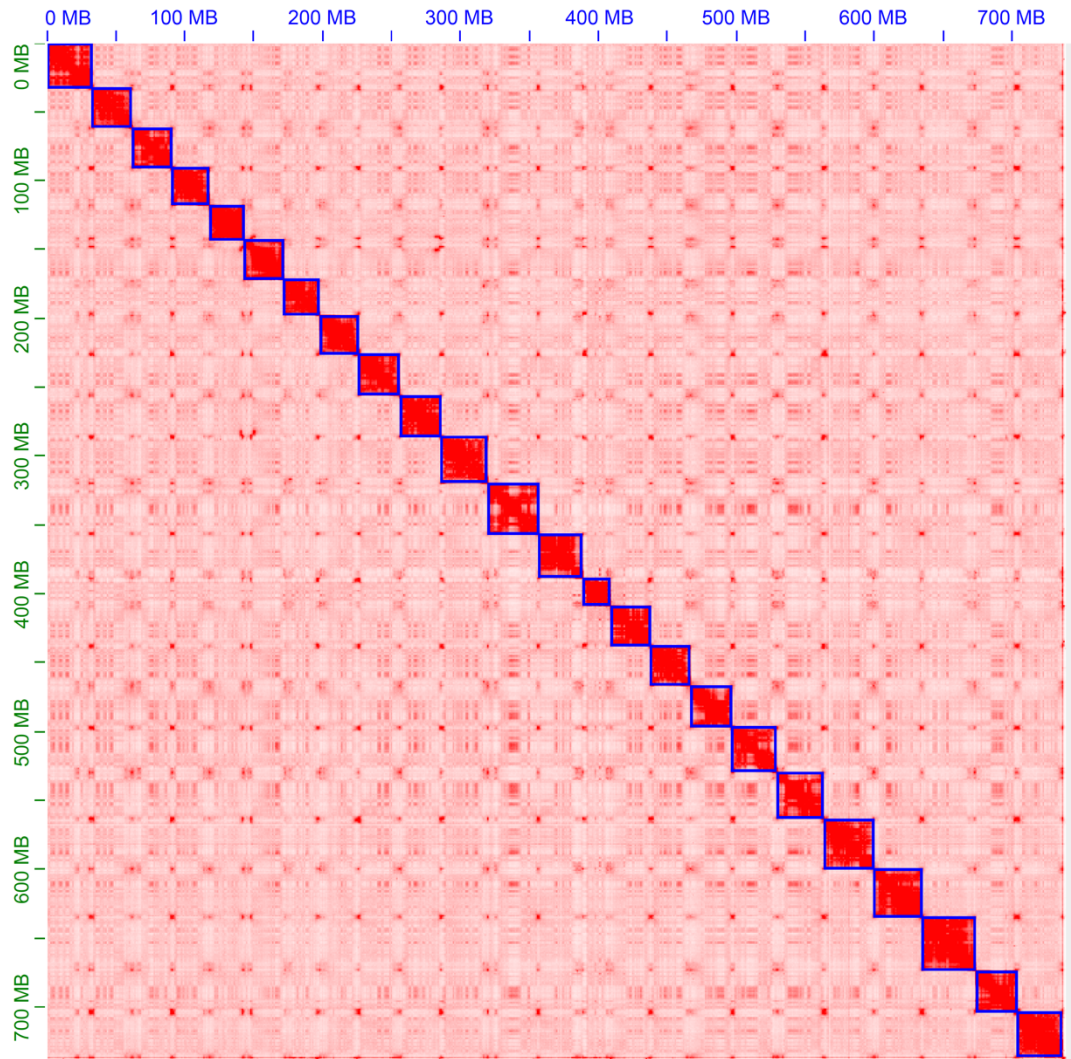

**Supplementary Figure S3 Hi-C interaction matrix for assembled *S. scherzeri* scaffolds generated using Juicebox Hi-C visualization**

Darker colors indicate higher frequency of chromatin interactions. Plot shows clear separation of chromosomal boundaries (blue rectangles) and limited off-diagonal interactions, supporting global structure of chromosome-scale scaffolds.

## BUSCO Assessment Results

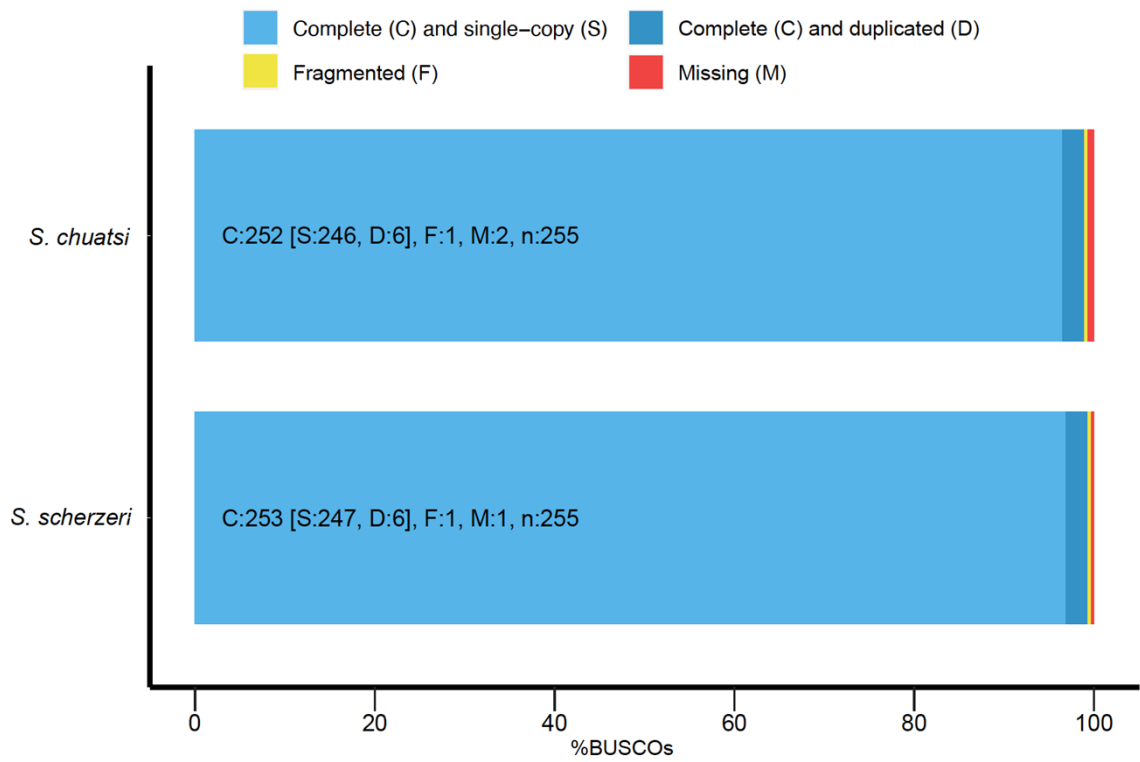

Supplementary Figure S4 BUSCO assessment of predicted gene models in *S. chuatsi* and *S. scherzeri*

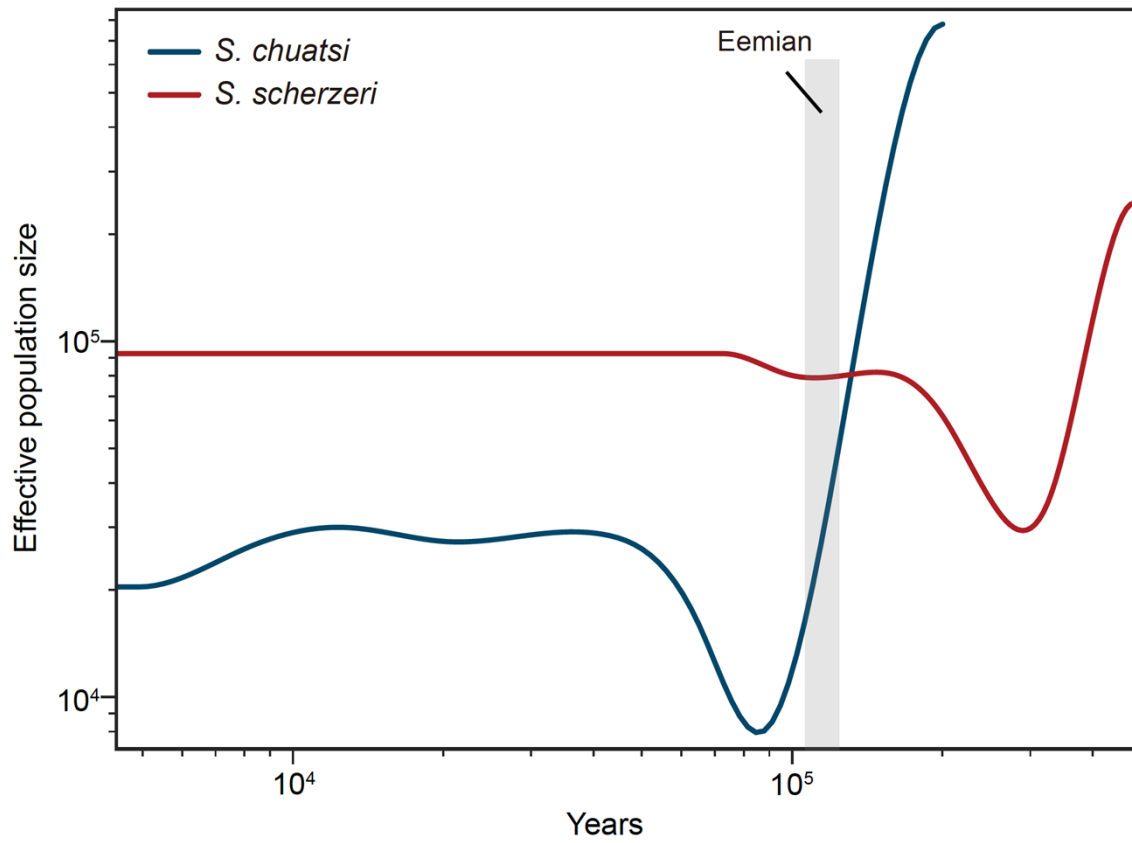

Supplementary Figure S5 Ancestral population sizes of *S. chuatsi* and *S. scherzeri* in North China (Jilin Province)

Ancestral population size of *S. scherzeri* from North China declined at ~300 ka.

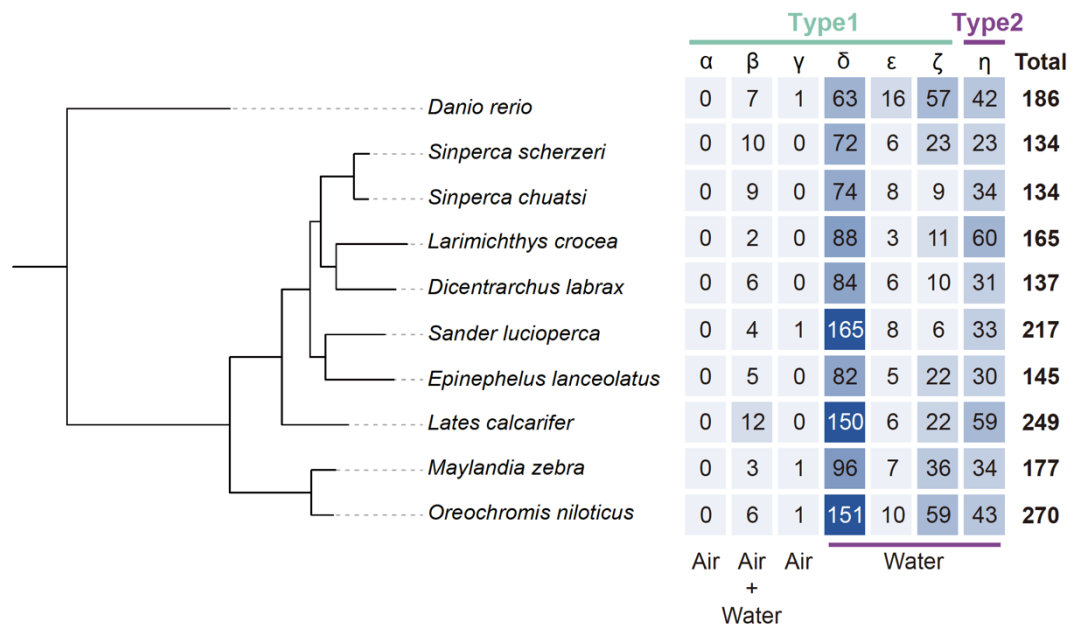

Supplementary Figure S6 Functional olfactory receptor (OR) genes identified in *S. chuatsi* and *S. scherzeri* genomes as well as seven other perciform fish species  
*Siniperca chuatsi* and *S. scherzeri* have fewer OR genes than other perciform species.

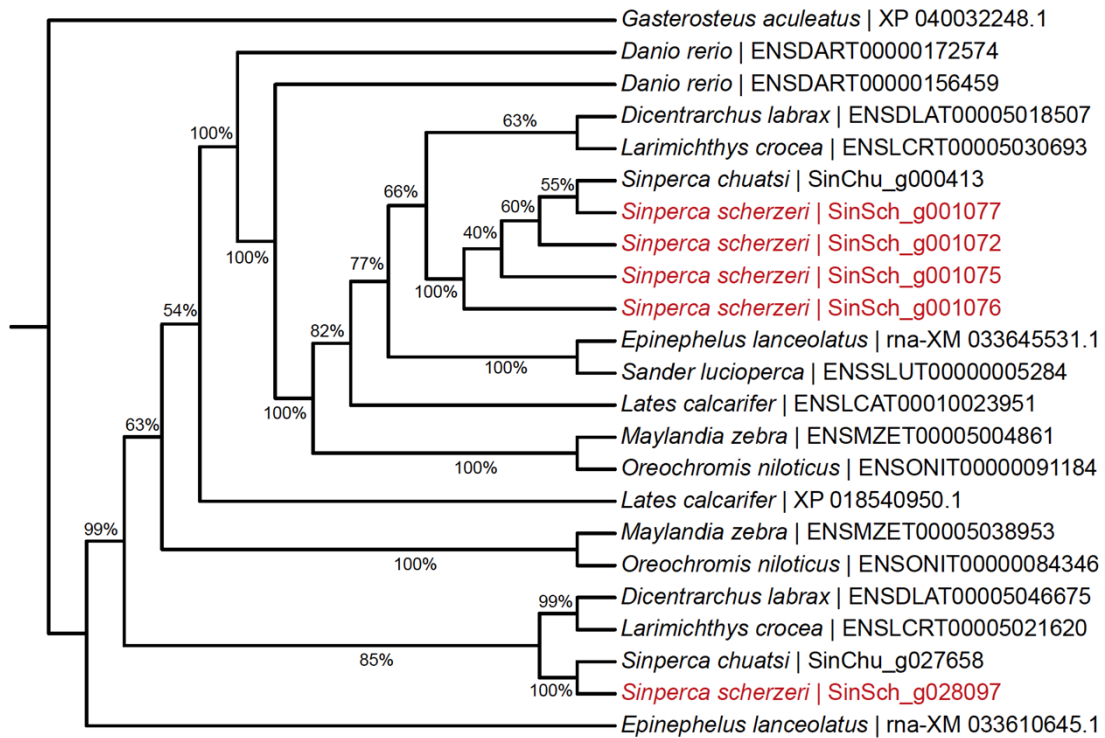

**Supplementary Figure S7 Phylogenetic tree of p300 genes in 10 perciform fish species**  
 p300 genes were significantly expanded in *S. scherzeri* genome (five copies) compared with all other perciform fish (two copies).



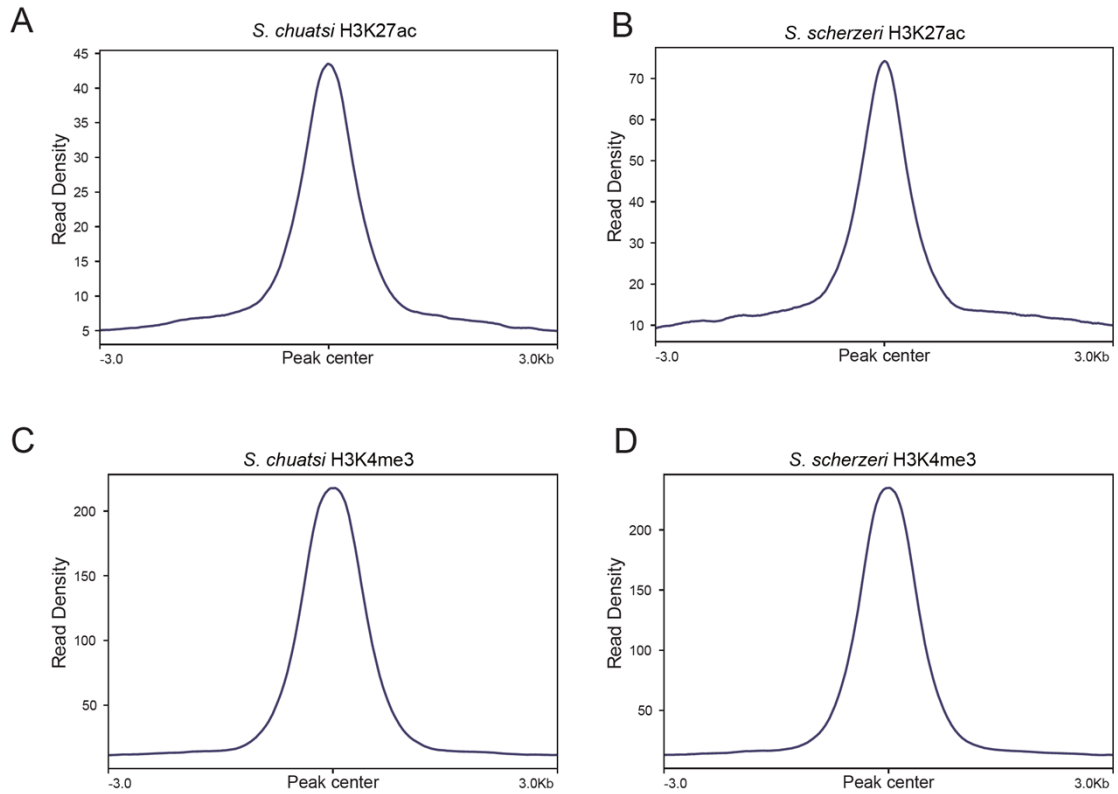

**Supplementary Figure S8 CUT&Tag signals of H3K27ac and H3K4me3**

H3K27ac CUT&Tag signals over replicated H3K27ac peaks in genomes of *S. chuatsi* (A) and *S. scherzeri* (B). H3K4me3 CUT&Tag signals over replicated H3K4me3 peaks in genomes of *S. chuatsi* (C) and *S. scherzeri* (D).

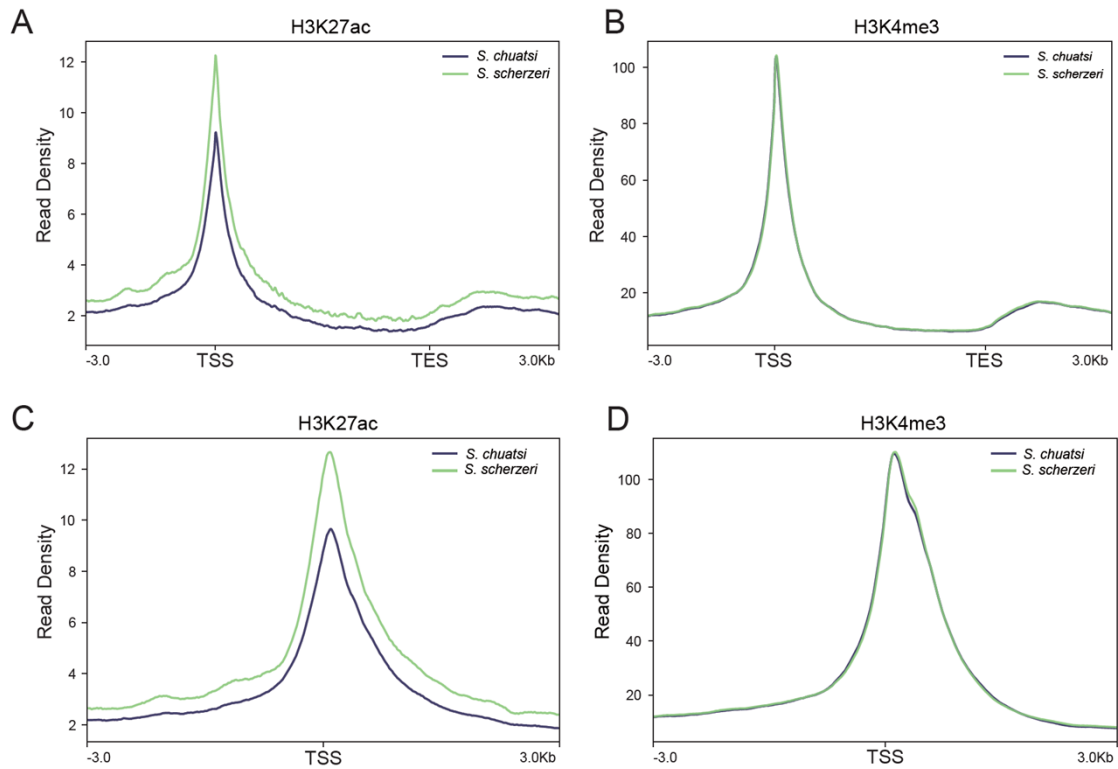

### Supplementary Figure S9 Quality control for CUT&Tag data

**A:** Most *S. chuatsi* and *S. scherzeri* genes show increased H3K27ac signals. **B:** Most *S. chuatsi* and *S. scherzeri* genes show increased H3K4me3 signals. **C:** Transcription start sites (TSSs) show particularly high H3K27ac signals in *S. chuatsi* and *S. scherzeri* genomes. **D:** TSSs show particularly high H3K4me3 signals in *S. chuatsi* and *S. scherzeri* genomes.

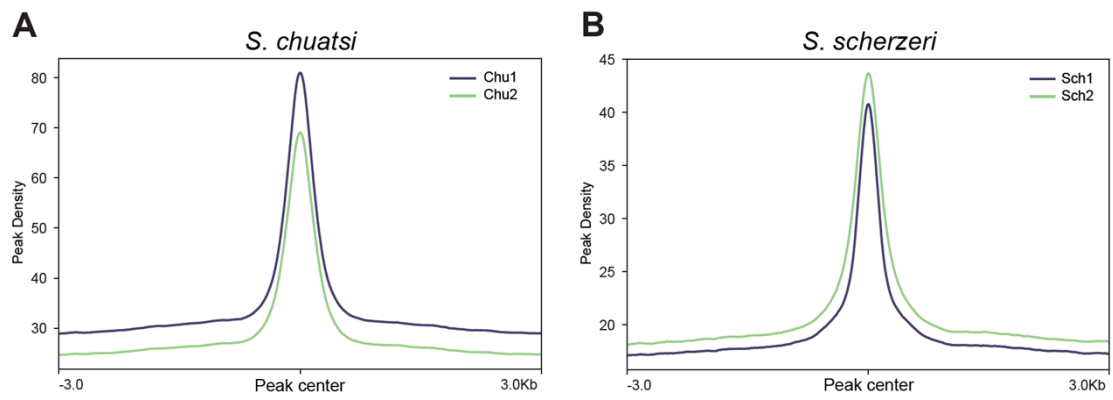

Supplementary Figure S10 ATAC-seq signals in *S. chuatsi* and *S. scherzeri* genomes

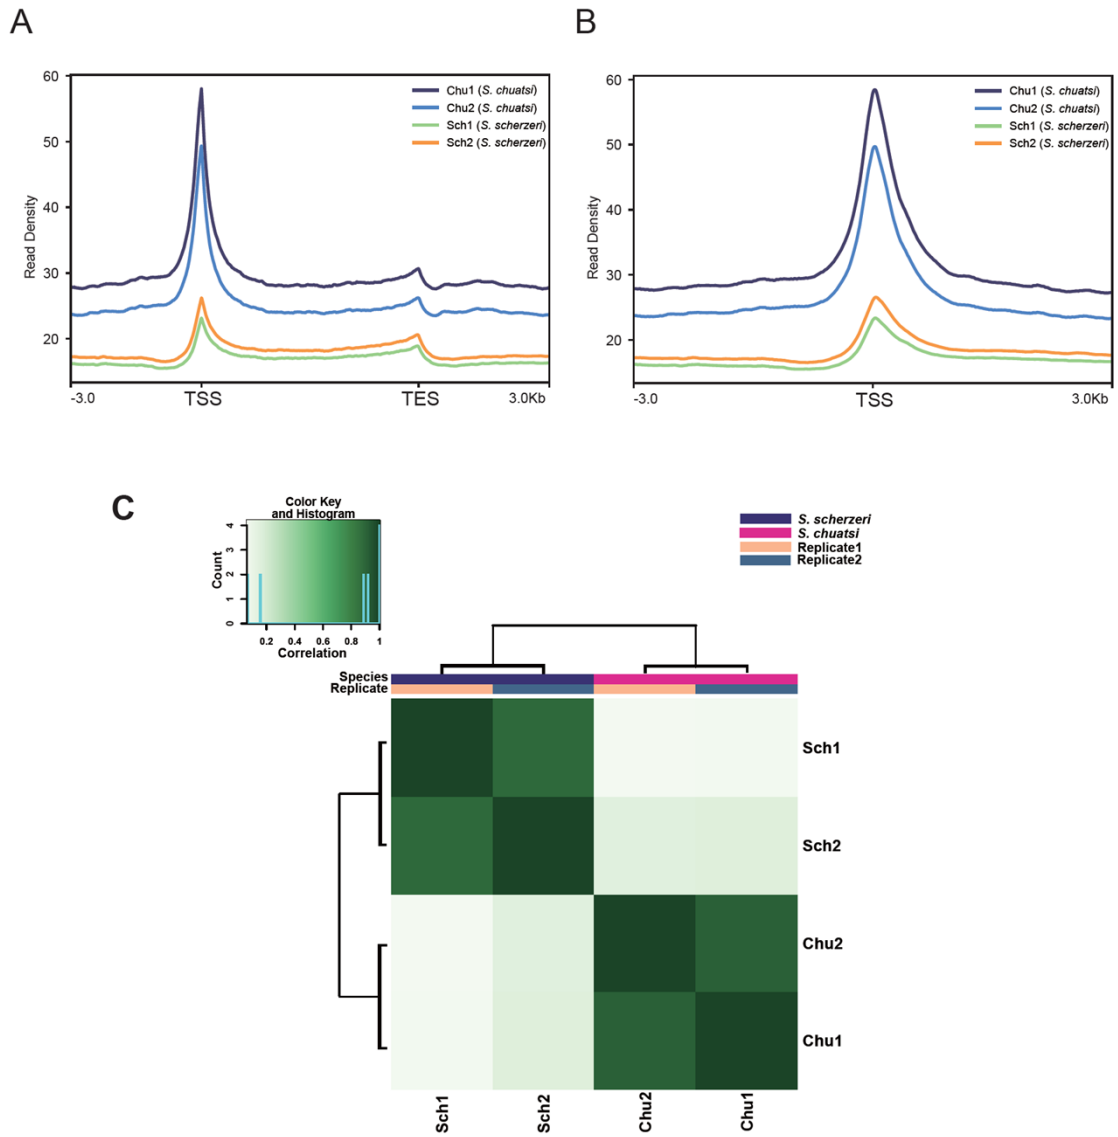

### Supplementary Figure S11 Quality control for ATAC-seq data

**A:** Most *S. chuatsi* and *S. scherzeri* genes show increased ATAC-seq signals. **B:** TSSs show particularly high ATAC-seq signals in *S. chuatsi* and *S. scherzeri* genomes. **C:** Correlation between two biological replicates of ATAC-seq of *S. chuatsi* (Chu1, Chu2) and *S. scherzeri* (Sch1, Sch2).

A

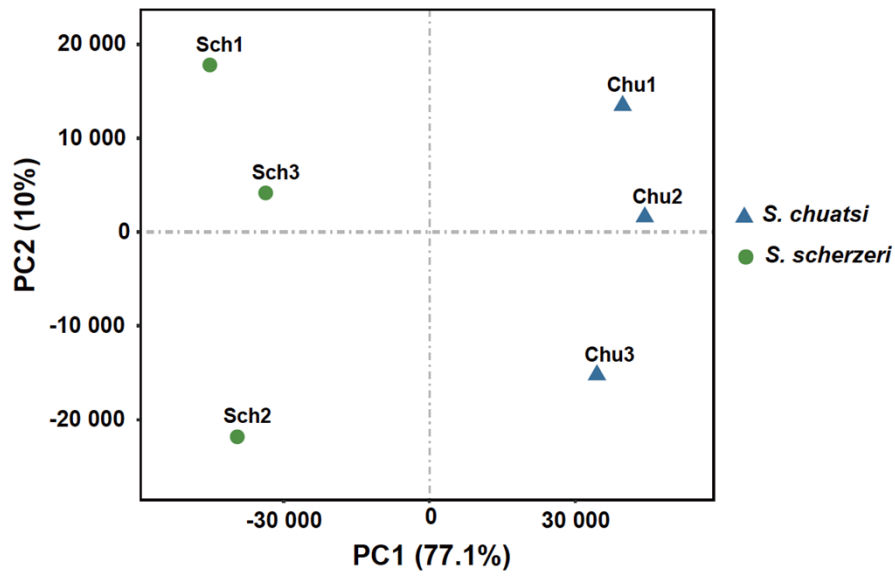

B

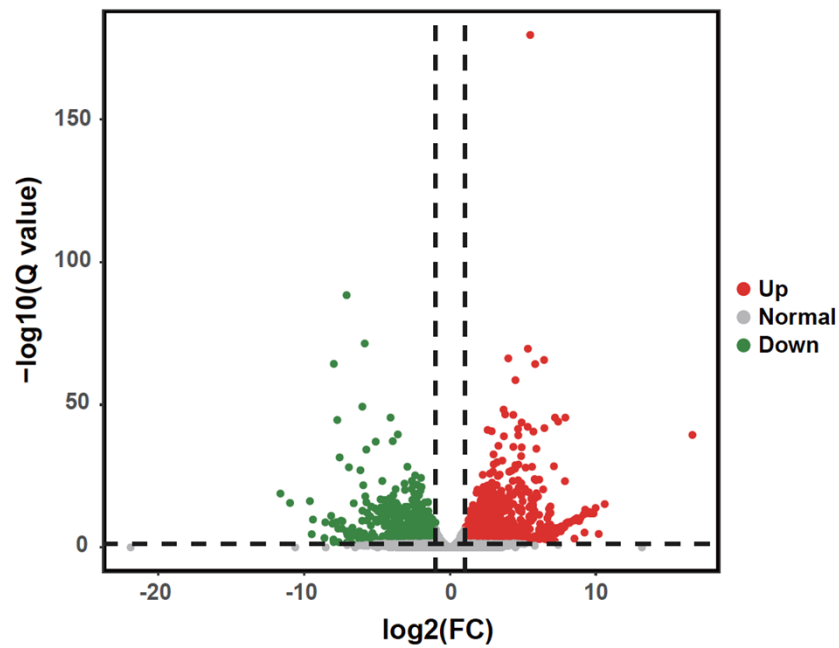

Supplementary Figure S12 Identification of differentially expressed genes (DEGs) in liver of *S. chuatsi* and *S. scherzeri*

**A:** Principal component analysis (PCA) of RNA-seq data revealed expression divergence between *S. chuatsi* and *S. scherzeri*. **B:** In total, 2 099 genes are up-regulated and 1 771 genes are down-regulated in *S. chuatsi* compared with *S. scherzeri*.

**A**

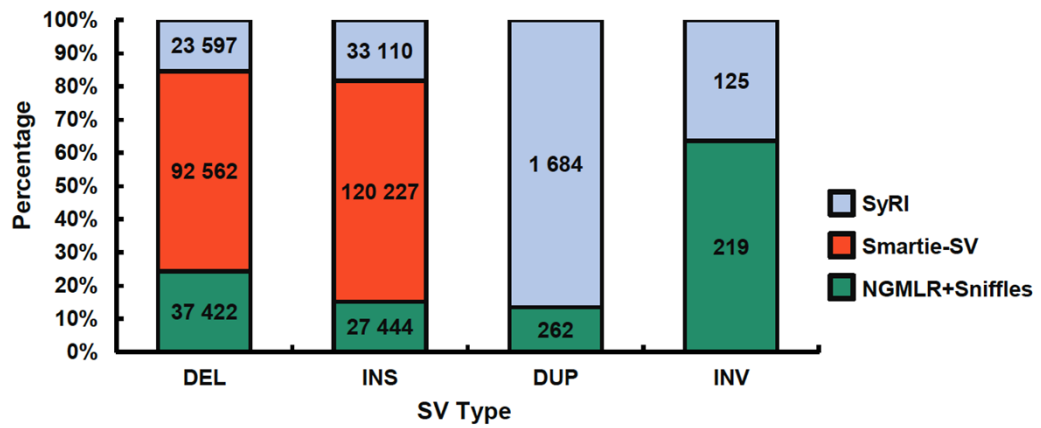

**B**

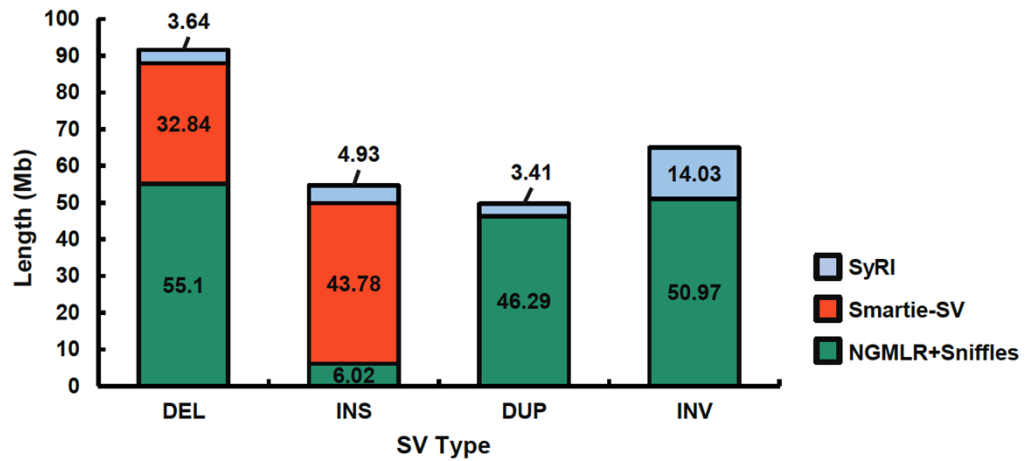

Supplementary Figure S13 Summary of genomic structural variants (SVs) detected using three different programs

**A:** Number of identified SVs. **B:** Length of identified SVs.

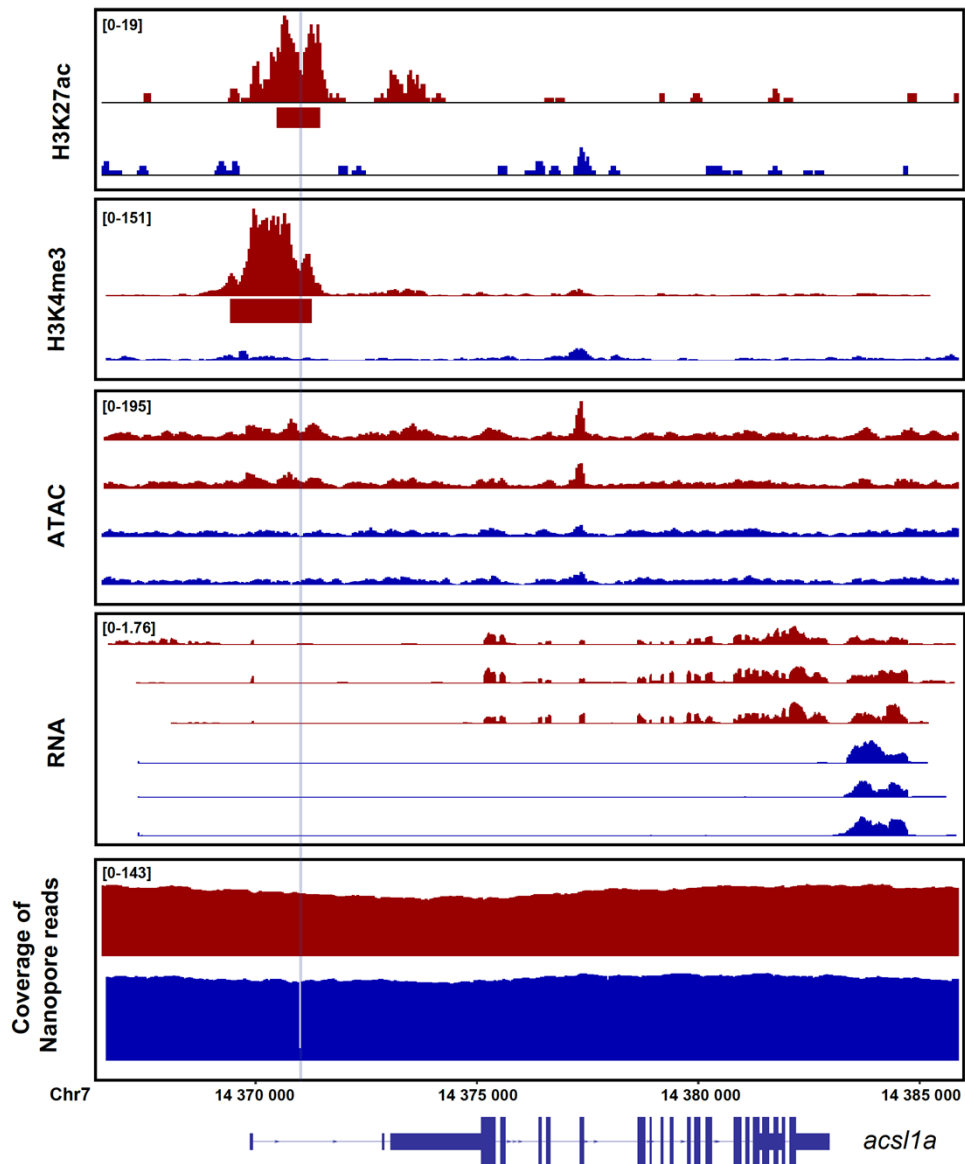

**Supplementary Figure S14** *Cis*-regulatory divergence between *S. chuatsi* (red) and *S. scherzeri* (blue) at *acs1a* gene

Intensities of H3K27ac, H3K4me3, ATAC-seq, and gene expression are shown. Mapping coverage of Nanopore reads is plotted to indicate genomic SVs. Deletion in *S. scherzeri* is denoted in light blue. MACS2-identified H3K27ac and H3K4me3 peaks are denoted with rectangles below tracks. Transcripts (with exons as boxes) are depicted.

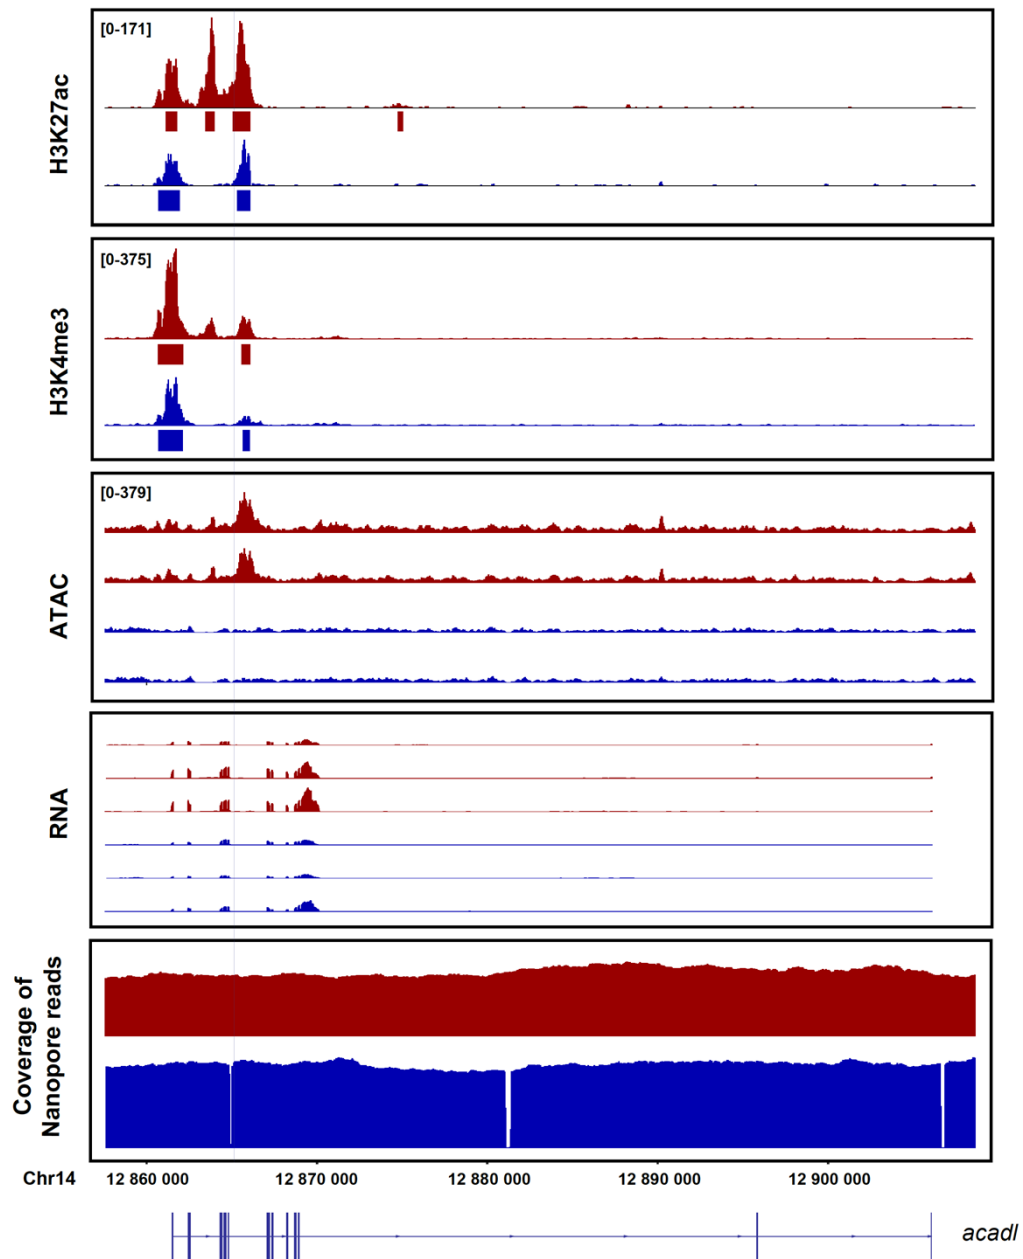

Supplementary Figure S15 *Cis*-regulatory divergence between *S. chuatsi* (red) and *S. scherzeri* (blue) at *acadl* gene

Intensities of H3K27ac, H3K4me3, ATAC-seq, and gene expression are shown. Mapping coverage of Nanopore reads is plotted to indicate genomic SVs. Deletion in *S. scherzeri* is denoted in light blue. MACS2-identified H3K27ac and H3K4me3 peaks are denoted with rectangles below tracks. Transcripts (with exons as boxes) are depicted.



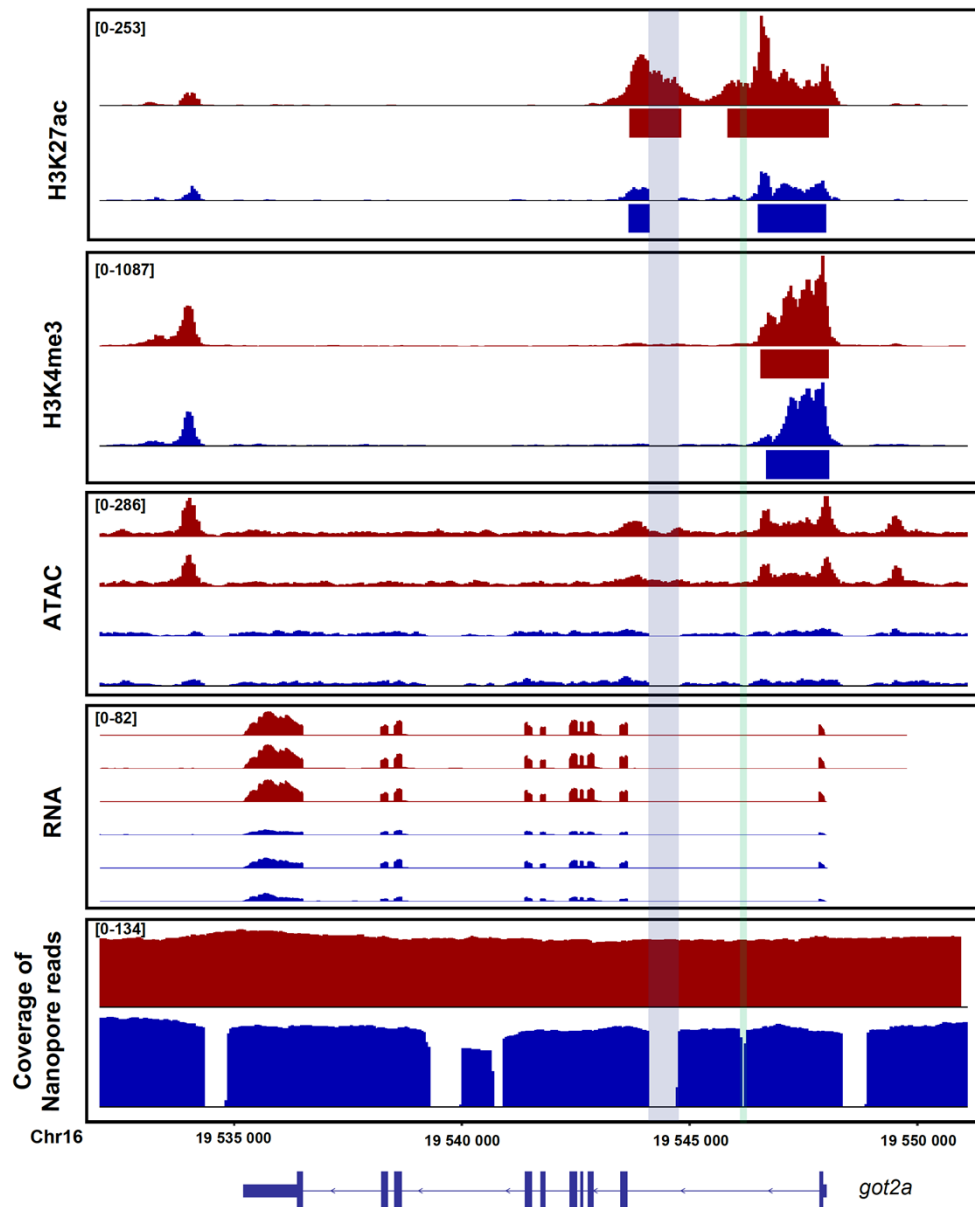

Supplementary Figure S16 *Cis*-regulatory divergence between *S. chuatsi* (red) and *S. scherzeri* (blue) at *got2a* gene

Intensities of H3K27ac, H3K4me3, ATAC-seq, and gene expression are shown. Mapping coverage of Nanopore reads is plotted to indicate genomic SVs. Two deletions in *S. scherzeri* are denoted in light blue and green, respectively. MACS2-identified H3K27ac and H3K4me3 peaks are denoted with rectangles below tracks. Transcripts (with exons as boxes) are depicted.

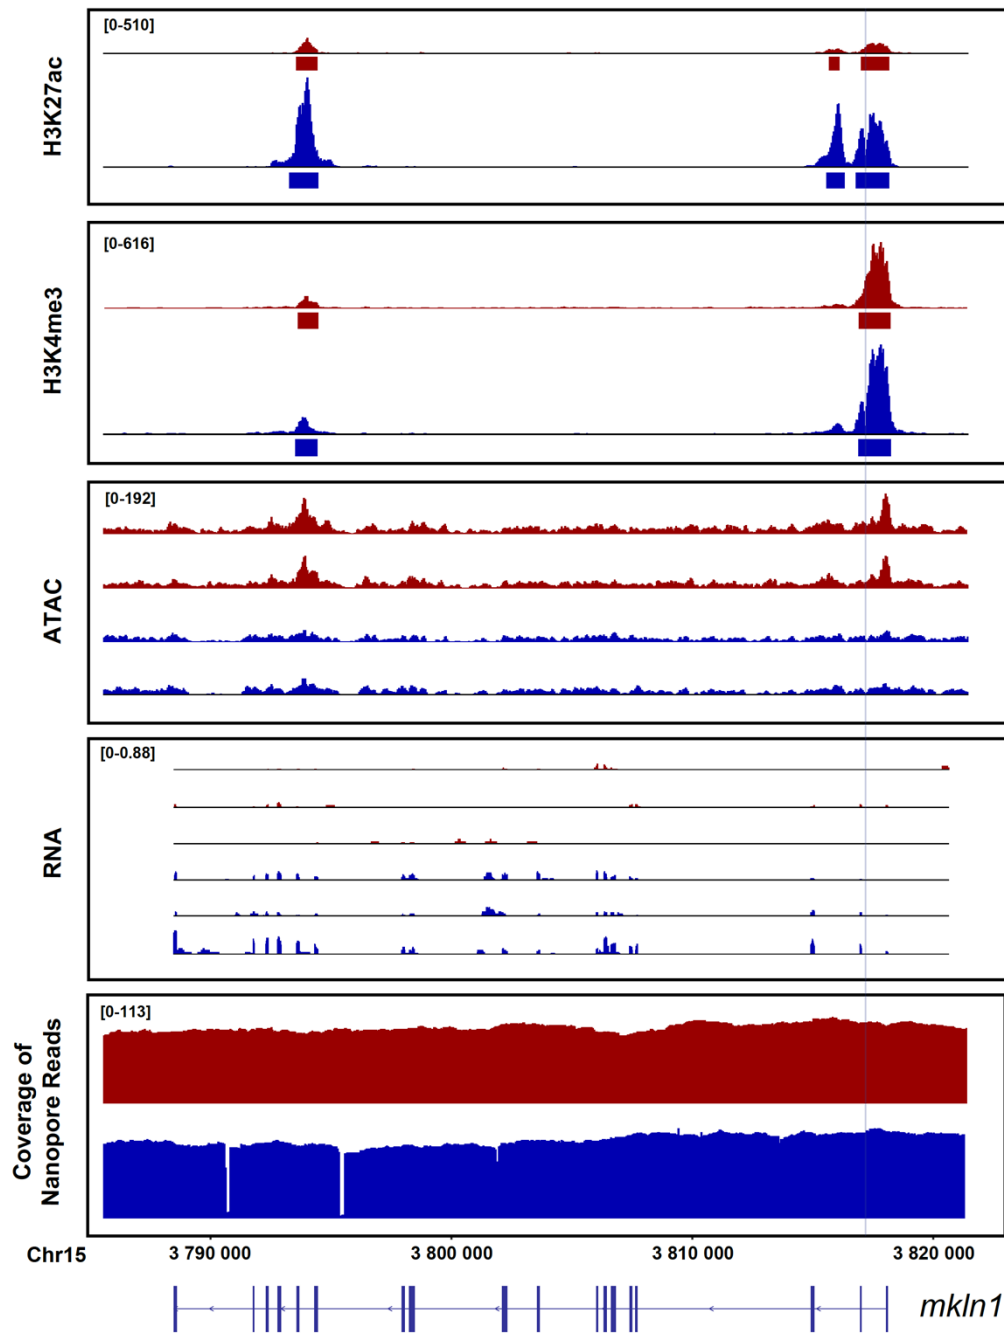

Supplementary Figure S17 *Cis*-regulatory divergence between *S. chuatsi* (red) and *S. scherzeri* (blue) at *mkl1* gene

Intensities of H3K27ac, H3K4me3, ATAC-seq, and gene expression are shown. Mapping coverage of Nanopore reads is plotted to indicate genomic SVs. Deletion in *S. chuatsi* is in light blue. MACS2-identified H3K27ac and H3K4me3 peaks are denoted with rectangles below tracks. Transcripts (with exons as boxes) are depicted.

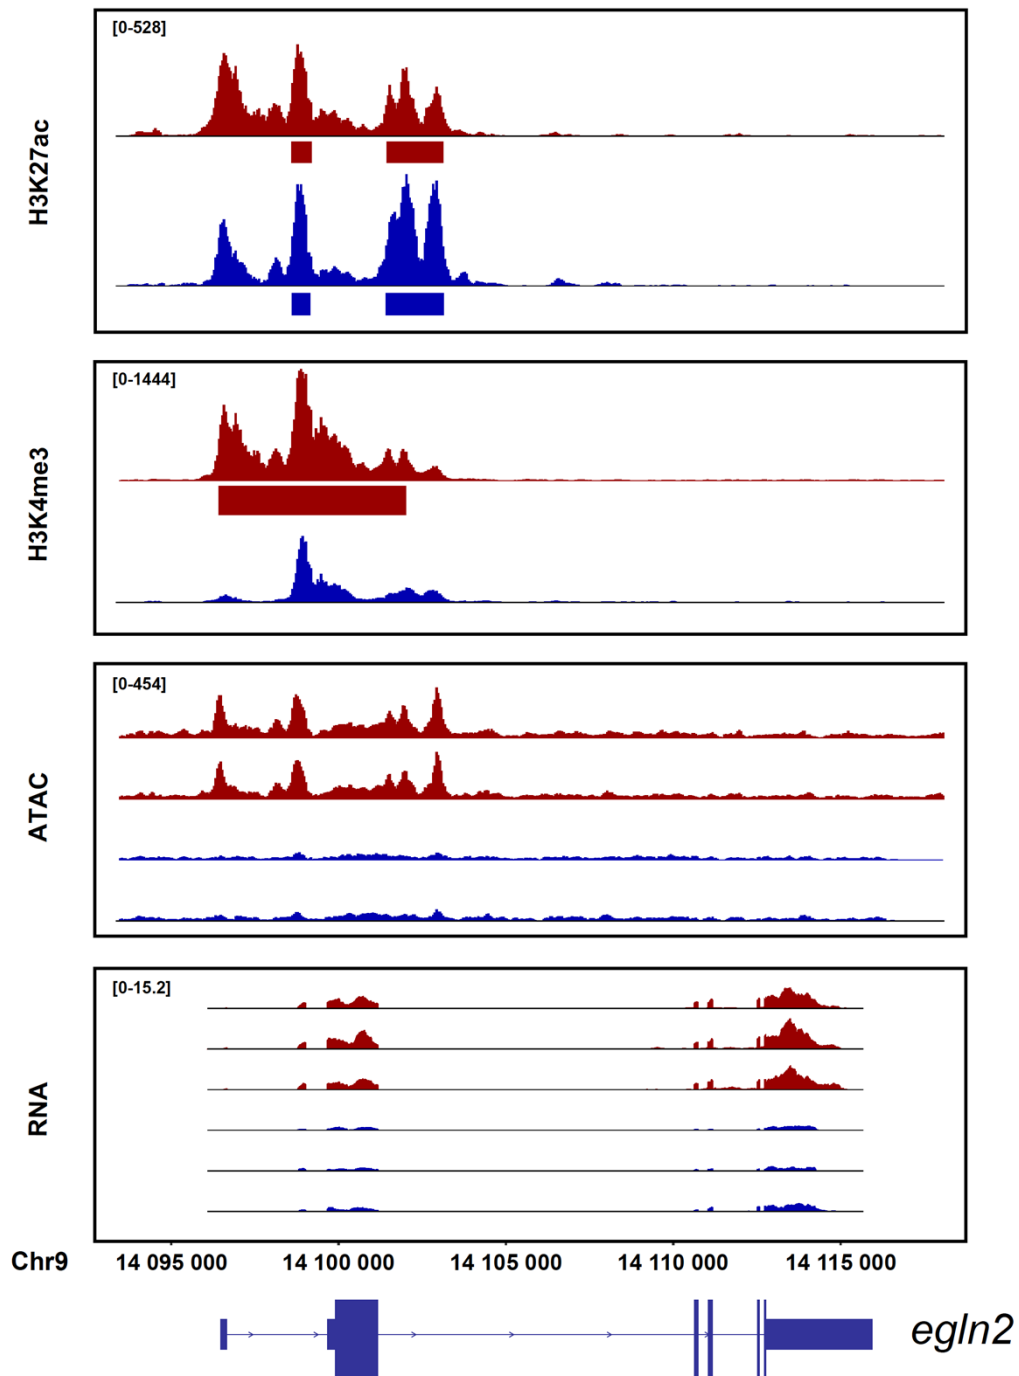

Supplementary Figure S18 *Cis*-regulatory divergence between *S. chuatsi* (red) and *S. scherzeri* (blue) at *eglN2* gene

Intensities of H3K27ac, H3K4me3, ATAC-seq, and gene expression are shown. MACS2-identified H3K27ac and broad H3K4me3 peaks are denoted with rectangles below track. Transcripts (with exons as boxes) are depicted.

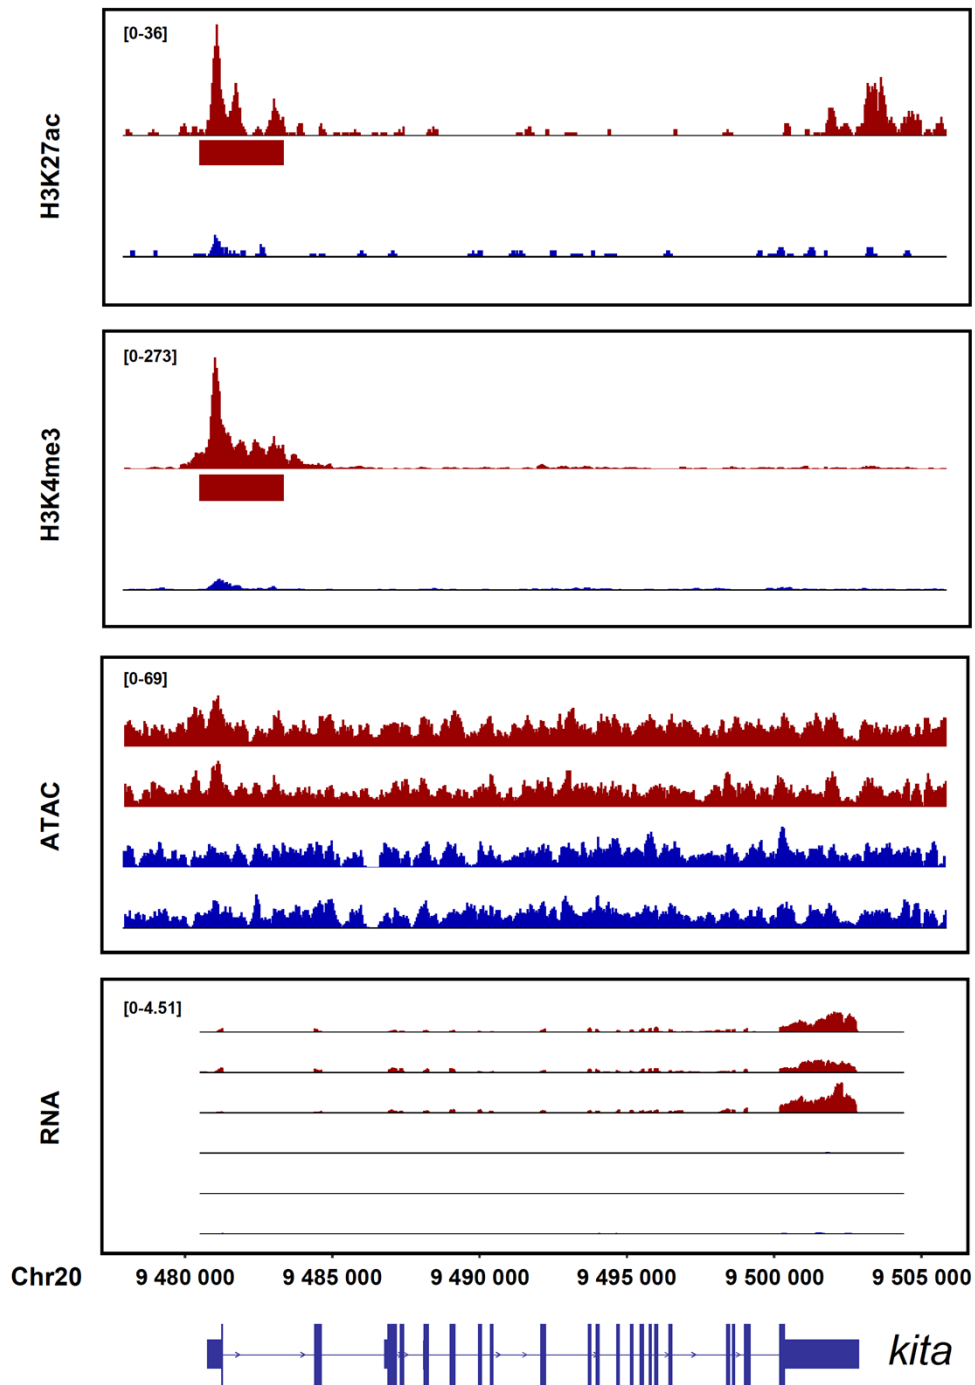

Supplementary Figure S19 *Cis*-regulatory divergence between *S. chuatsi* (red) and *S. scherzeri* (blue) at *kita* gene

Intensities of H3K27ac, H3K4me3, ATAC-seq, and gene expression are shown. MACS2-identified H3K27ac and broad H3K4me3 peaks are denoted with rectangles below tracks. Transcripts (with exons as boxes) are depicted.

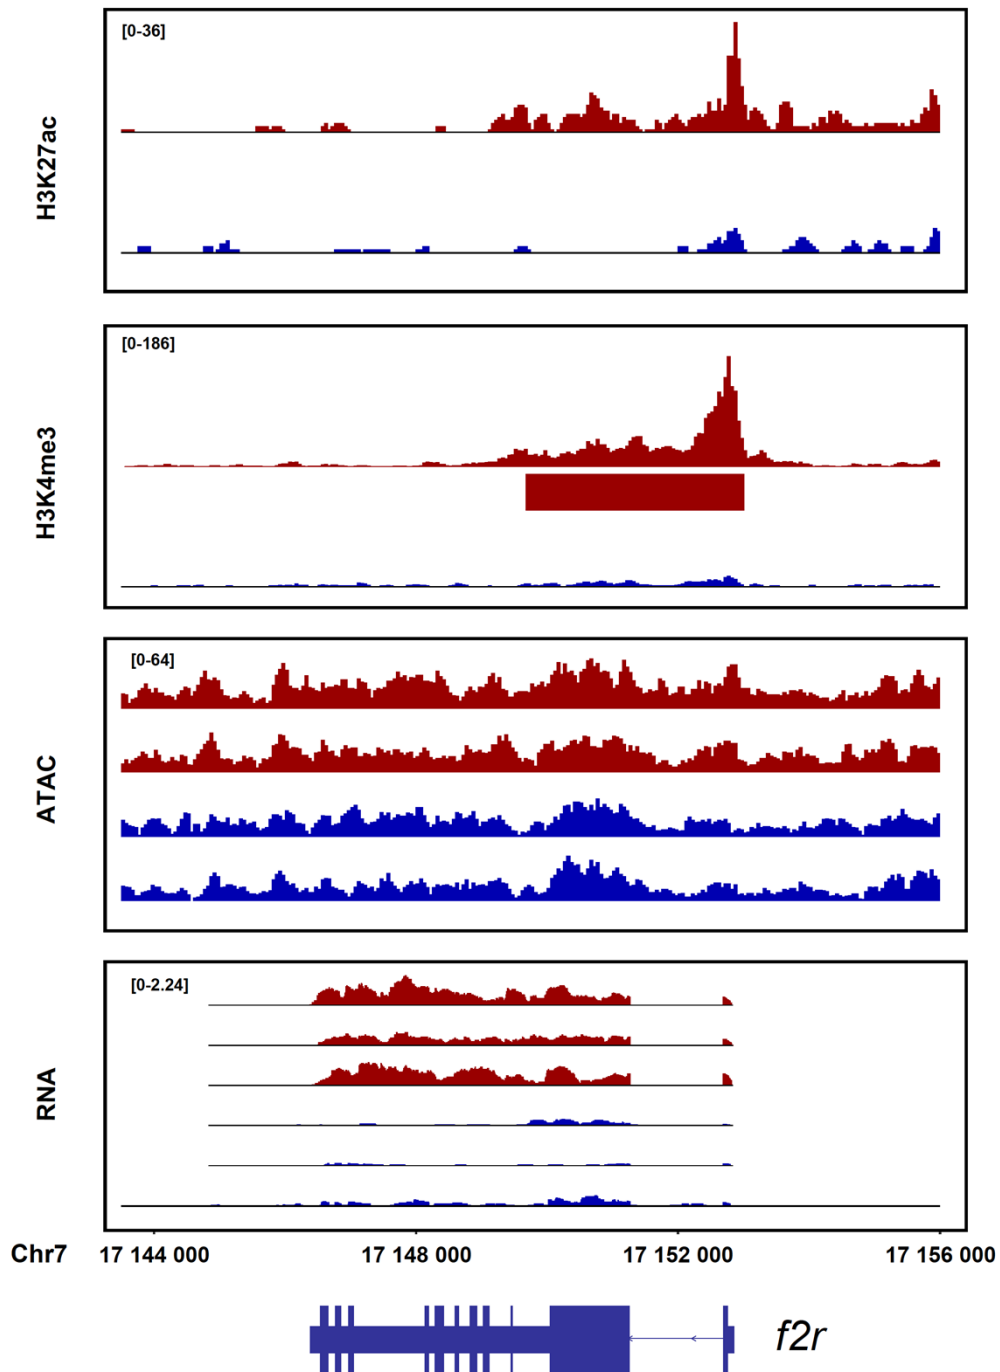

Supplementary Figure S20 *Cis*-regulatory divergence between *S. chuatsi* (Red) and *S. scherzeri* (Blue) at *f2r* gene

Intensities of H3K27ac, H3K4me3, ATAC-seq, and gene expression are shown. MACS2-identified H3K27ac and broad H3K4me3 peaks are denoted with rectangles below track. Transcripts (with exons as boxes) are depicted.

**Supplementary Table S1** Basic statistics of Illumina reads

|                     | <b>Number of reads</b> | <b>Total bases (bp)</b> | <b>Depth of coverage<br/>( × )</b> |
|---------------------|------------------------|-------------------------|------------------------------------|
| <i>S. chuatsi</i>   | 412 923 280            | 61 938 492 000          | 86.5                               |
| <i>S. scherzeri</i> | 308 477 640            | 46 271 646 000          | 62.5                               |

**Supplementary Table S2** Basic statistics of Nanopore reads

|                     | Total number of reads | Total number of bases (Gb) | Maximum length of reads (bp) | Minimum length of reads (bp) | Average length of reads (bp) | Depth of coverage (×) |
|---------------------|-----------------------|----------------------------|------------------------------|------------------------------|------------------------------|-----------------------|
| <i>S. chuatsi</i>   | 4 978 504             | 97.7                       | 240 827                      | 42                           | 19 630                       | 136.4                 |
| <i>S. scherzeri</i> | 3 926 889             | 94.3                       | 243 874                      | 105                          | 24 010                       | 127.3                 |

**Supplementary Table S3** Basic statistics of Hi-C reads

|                     | <b>Total bases (bp)</b> | <b>Depth of coverage (×)</b> | <b>cis-chromosomal interaction (&gt; 20 kb)</b> | <b>cis-chromosomal interaction (&lt; 20 kb)</b> |
|---------------------|-------------------------|------------------------------|-------------------------------------------------|-------------------------------------------------|
| <i>S. chuatsi</i>   | 94 818 391 200          | 132.4                        | 24 %                                            | 7 %                                             |
| <i>S. scherzeri</i> | 102 637 460 100         | 138.6                        | 19 %                                            | 7%                                              |



**Supplementary Table S4** Statistics of *S. chuatsi* genome assembly

|       | Contig      |        | Scaffold    |        |
|-------|-------------|--------|-------------|--------|
|       | Size (bp)   | Number | Size (bp)   | Number |
| N50   | 21 551 097  | 14     | 29 956 575  | 11     |
| N60   | 19 623 084  | 18     | 29 175 850  | 14     |
| N70   | 13 306 200  | 22     | 28 362 969  | 16     |
| N80   | 8 640 736   | 29     | 27 500 176  | 19     |
| N90   | 3 004 397   | 42     | 24 860 938  | 21     |
| Total | 716 210 655 | 328    | 716 348 155 | 191    |

**Supplementary Table S5** Statistics of *S. scherzeri* genome assembly

|       | Contig      |        | Scaffold    |        |
|-------|-------------|--------|-------------|--------|
|       | Size (bp)   | Number | Size (bp)   | Number |
| N50   | 16 036 871  | 15     | 30 486 584  | 11     |
| N60   | 14 480 942  | 19     | 30 021 833  | 14     |
| N70   | 9 520 673   | 26     | 29 387 193  | 16     |
| N80   | 5 357 922   | 36     | 28 699 791  | 19     |
| N90   | 3 383 819   | 53     | 27 297 733  | 21     |
| Total | 740 384 376 | 406    | 740 538 376 | 252    |

**Supplementary Table S6** BUSCO evaluation of *S. chuatsi* and *S. scherzeri* genome assemblies

|                                 | <i>S. chuatsi</i> | <i>S. scherzeri</i> |
|---------------------------------|-------------------|---------------------|
| Complete BUSCOs                 | 3562 (97.9%)      | 3593 (98.7%)        |
| Complete and single-copy BUSCOs | 3540 (97.3%)      | 3567 (98.0%)        |
| Complete and duplicated BUSCOs  | 22 (0.6%)         | 26 (0.7%)           |
| Fragmented BUSCOs               | 16                | 17                  |
| Missing BUSCOs                  | 62                | 30                  |
| Total BUSCO groups searched     | 3640              | 3640                |

**Supplementary Table S7** RNA-seq reads alignment statistics of two *S. chuatsi* assemblies

|                                     | Assembly      | Unmapped reads (%) | Uniquely mapped reads (%) | Multi-mapping reads (%) | Mapping rate (%) |
|-------------------------------------|---------------|--------------------|---------------------------|-------------------------|------------------|
| <b>Eye</b>                          | sinChu7       | 15.50%             | 81.50%                    | 2.42%                   | 86.13%           |
|                                     | This assembly | 6.79%              | 86.72%                    | 5.88%                   | 95.00%           |
| <b>Gill</b>                         | sinChu7       | 20.19%             | 75.80%                    | 3.48%                   | 81.64%           |
|                                     | This assembly | 7.23%              | 85.40%                    | 6.86%                   | 95.10%           |
| <b>Heart</b>                        | sinChu7       | 14.38%             | 82.07%                    | 3.17%                   | 87.52%           |
|                                     | This assembly | 6.85%              | 87.71%                    | 5.05%                   | 95.17%           |
| <b>Intestine</b>                    | sinChu7       | 20.03%             | 76.12%                    | 3.42%                   | 82.23%           |
|                                     | This assembly | 9.05%              | 84.01%                    | 6.56%                   | 93.71%           |
| <b>Kidney</b>                       | sinChu7       | 14.61%             | 82.01%                    | 2.87%                   | 87.22%           |
|                                     | This assembly | 9.09%              | 86.13%                    | 4.28%                   | 93.21%           |
| <b>Liver</b>                        | sinChu7       | 6.56%              | 86.74%                    | 6.38%                   | 94.57%           |
|                                     | This assembly | 5.59%              | 88.67%                    | 5.40%                   | 95.80%           |
| <b>Spleen</b>                       | sinChu7       | 7.94%              | 84.68%                    | 6.96%                   | 94.42%           |
|                                     | This assembly | 7.39%              | 85.05%                    | 7.15%                   | 95.36%           |
| <b>Stomach</b>                      | sinChu7       | 19.85%             | 75.06%                    | 4.78%                   | 81.72%           |
|                                     | This assembly | 7.51%              | 83.84%                    | 8.36%                   | 94.51%           |
| <b>Testis</b>                       | sinChu7       | 9.31%              | 86.75%                    | 3.43%                   | 92.57%           |
|                                     | This assembly | 6.73%              | 88.36%                    | 4.35%                   | 95.39%           |
| <b>Brain*<br/>(SRR10867828)</b>     | sinChu7       | 28.86%             | 67.91%                    | 1.74%                   | 78.14%           |
|                                     | This assembly | 21.72%             | 72.20%                    | 4.52%                   | 86.40%           |
| <b>Intestine*<br/>(SRR10867827)</b> | sinChu7       | 36.82%             | 59.18%                    | 2.68%                   | 69.86%           |
|                                     | This assembly | 22.28%             | 67.67%                    | 8.65%                   | 86.76%           |
| <b>Liver*<br/>(SRR10867826)</b>     | sinChu7       | 33.45%             | 59.68%                    | 5.52%                   | 72.34%           |
|                                     | This assembly | 19.70%             | 67.72%                    | 11.12%                  | 88.45%           |
| <b>Muscle*<br/>(SRR10867825)</b>    | sinChu7       | 31.39%             | 58.95%                    | 8.38%                   | 75.42%           |
|                                     | This assembly | 25.37%             | 65.10%                    | 8.16%                   | 84.25%           |

**Note:** RNA-seq reads from He *et al.* (2019) [1] were denoted with \*

## Reference

He S, Li L, Lv LY, Cai WJ, Dou YQ, Li J, Tang SL, Chen X, Zhang Z, Xu J *et al.* 2020. Mandarin fish (Sinipercaidae) genomes provide insights into innate predatory feeding. *Communications Biology*, **3**(1): 361.

**Supplementary Table S8** RNA-seq reads alignment statistics of two *S. scherzeri* assemblies

|                  | <b>Assembly</b> | <b>Unmapped reads (%)</b> | <b>Uniquely mapped reads (%)</b> | <b>Multi-mapping reads (%)</b> | <b>Mapping rate (%)</b> |
|------------------|-----------------|---------------------------|----------------------------------|--------------------------------|-------------------------|
| <b>Eye</b>       | sinSch6b        | 6.17%                     | 89.64%                           | 3.91%                          | 96.09%                  |
|                  | This assembly   | 5.39%                     | 91.81%                           | 2.52%                          | 96.74%                  |
| <b>Gill</b>      | sinSch6b        | 10.35%                    | 86.09%                           | 3.20%                          | 92.71%                  |
|                  | This assembly   | 7.16%                     | 88.14%                           | 4.35%                          | 95.44%                  |
| <b>Heart</b>     | sinSch6b        | 6.77%                     | 87.17%                           | 5.77%                          | 95.61%                  |
|                  | This assembly   | 5.46%                     | 90.75%                           | 3.48%                          | 96.74%                  |
| <b>Intestine</b> | sinSch6b        | 10.29%                    | 85.27%                           | 4.03%                          | 93.01%                  |
|                  | This assembly   | 6.92%                     | 88.92%                           | 3.79%                          | 95.83%                  |
| <b>Kidney</b>    | sinSch6b        | 8.65%                     | 85.76%                           | 5.28%                          | 94.18%                  |
|                  | This assembly   | 6.53%                     | 89.94%                           | 3.20%                          | 96.02%                  |
| <b>Liver</b>     | sinSch6b        | 8.16%                     | 85.66%                           | 5.75%                          | 94.26%                  |
|                  | This assembly   | 4.55%                     | 88.77%                           | 6.39%                          | 97.29%                  |
| <b>Spleen</b>    | sinSch6b        | 11.06%                    | 85.30%                           | 3.27%                          | 92.60%                  |
|                  | This assembly   | 8.10%                     | 87.76%                           | 3.78%                          | 95.10%                  |
| <b>Stomach</b>   | sinSch6b        | 7.05%                     | 88.67%                           | 3.96%                          | 95.32%                  |
|                  | This assembly   | 4.98%                     | 90.95%                           | 3.76%                          | 97.01%                  |
| <b>Testis</b>    | sinSch6b        | 7.91%                     | 86.49%                           | 5.35%                          | 94.78%                  |
|                  | This assembly   | 5.94%                     | 90.74%                           | 3.07%                          | 96.40%                  |

**Supplementary Table S9** Statistics of assembly quality and completeness evaluation using Mercury

|                     |               | <b>QV</b> | <b>Error rate</b> | <b>Completeness (%)</b> |
|---------------------|---------------|-----------|-------------------|-------------------------|
| <i>S. chuatsi</i>   | This assembly | 36.9142   | 0.000203508       | 96.397                  |
|                     | sinChu7       | 32.3679   | 0.000579707       | 97.1919                 |
| <i>S. scherzeri</i> | This assembly | 35.7313   | 0.000267218       | 95.7469                 |
|                     | sinSch6       | 30.9618   | 0.000801352       | 93.7093                 |

**Supplementary Table S10** Summary of annotated repeats in *S. chuatsi* genome

|                                   | Number         | Length (bp)        | Percentage (%) |
|-----------------------------------|----------------|--------------------|----------------|
| <b>Retroelements</b>              |                |                    |                |
| SINEs:                            | 25 488         | 2 507 374          | 0.35           |
| MIRs                              | 8 935          | 1 040 905          | 0.15           |
| LINEs:                            | 151 607        | 37 269 631         | 5.20           |
| LINE1                             | 2 091          | 351 931            | 0.05           |
| LINE2                             | 73 943         | 17 149 829         | 2.39           |
| LTR elements:                     | 24 221         | 6 034 393          | 0.84           |
| ERV_classI                        | 1 217          | 622 070            | 0.09           |
| <b>DNA transposons:</b>           | <b>383 869</b> | <b>55 184 211</b>  | <b>7.70</b>    |
| hAT-Charlie                       | 18 456         | 2 008 459          | 0.28           |
| <b>Unclassified:</b>              | <b>600 490</b> | <b>76 225 084</b>  | <b>10.64</b>   |
| <b>Total interspersed repeats</b> |                | <b>177 220 693</b> | <b>24.74</b>   |
| <b>Small RNA:</b>                 | <b>4 196</b>   | <b>441 630</b>     | <b>0.06</b>    |
| <b>Satellites:</b>                | <b>643</b>     | <b>169 440</b>     | <b>0.02</b>    |
| <b>Simple repeats:</b>            | <b>318 886</b> | <b>16 965 675</b>  | <b>2.37</b>    |
| <b>Low complexity</b>             | <b>37 739</b>  | <b>2 290 874</b>   | <b>0.32</b>    |
| <b>Total</b>                      |                | <b>196 347 086</b> | <b>27.41</b>   |

**Supplementary Table S11** Summary of annotated repeats in *S. scherzeri* genome

|                                   | Number         | Length (bp)        | Percentage (%) |
|-----------------------------------|----------------|--------------------|----------------|
| <b>Retroelements</b>              |                |                    |                |
| SINEs:                            | 28 055         | 2 578 008          | 0.35           |
| MIRs                              | 11 449         | 1 294 403          | 0.17           |
| LINEs:                            | 154 990        | 43 019 685         | 5.81           |
| LINE1                             | 2 382          | 514 798            | 0.07           |
| LINE2                             | 77 893         | 19 455 186         | 2.63           |
| LTR elements:                     | 34 632         | 7 746 310          | 1.05           |
| ERV_classI                        | 4128           | 1 000 999          | 0.14           |
| ERV_classII                       | 570            | 86 334             | 0.01           |
| <b>DNA transposons:</b>           | <b>393 505</b> | <b>55 646 827</b>  | <b>7.51</b>    |
| hAT-Charlie                       | 12 997         | 1 541 780          | 0.21           |
| TcMar-Tigger                      | 957            | 69 671             | 0.01           |
| <b>Unclassified:</b>              | <b>645 653</b> | <b>80 168 797</b>  | <b>10.83</b>   |
| <b>Total interspersed repeats</b> |                | <b>189 159 627</b> | <b>25.54</b>   |
| <b>Small RNA:</b>                 | <b>3 604</b>   | <b>646 701</b>     | <b>0.09</b>    |
| <b>Satellites:</b>                | <b>2 528</b>   | <b>273 497</b>     | <b>0.04</b>    |
| <b>Simple repeats:</b>            | <b>329 210</b> | <b>17 681 281</b>  | <b>2.39</b>    |
| <b>Low complexity</b>             | <b>38 168</b>  | <b>2 295 851</b>   | <b>0.31</b>    |
| <b>Total</b>                      |                | <b>209 398 734</b> | <b>28.28</b>   |



**Supplementary Table S12** Whole-genome gene annotation for *S. chuatsi* using different prediction approaches

|                      | <b>Gene set</b>               | <b>Gene Number</b> | <b>Exon Number</b> |
|----------------------|-------------------------------|--------------------|--------------------|
| <i>De novo</i> based | Braker2 (Illumina)            | 38 330             | 392 512            |
|                      | Braker2 (PacBio Iso-seq)      | 37 689             | 246 953            |
| Homolog based        | <i>Danio rerio</i>            | 31 454             | 290 167            |
|                      | <i>Oryzias latipes</i>        | 39 946             | 353 988            |
|                      | <i>Takifugu rubripes</i>      | 25 652             | 252 838            |
|                      | <i>Gasterosteus aculeatus</i> | 32 183             | 280 964            |
|                      | <i>Tetraodon nigroviridi</i>  | 21 112             | 229 856            |
| RNA-seq based        | Stringtie (Illumina)          | 26 700             | 705 699            |
|                      | Stringtie (Iso-seq)           | 5 251              | 50 443             |
|                      | PASA                          | 176 040            | 2 194 858          |
|                      | EVM Integration               | 28 905             | 255 740            |
|                      | PASA Update                   | 29 278             | 585 487            |

**Supplementary Table S13** Whole-genome gene annotation for *S. scherzeri* using different prediction approaches

|                        | <b>Gene set</b>               | <b>Gene Number</b> | <b>Exon Number</b> |
|------------------------|-------------------------------|--------------------|--------------------|
| <i>Ab initio</i> based | Braker2 (Illumina)            | 39 599             | 396 977            |
|                        | Braker2 (PacBio Iso-seq)      | 42 435             | 271 365            |
| Homolog based          | <i>Danio rerio</i>            | 30 977             | 291 720            |
|                        | <i>Oryzias latipes</i>        | 41 571             | 357 174            |
|                        | <i>Takifugu rubripes</i>      | 25 743             | 253 974            |
|                        | <i>Gasterosteus aculeatus</i> | 31 746             | 281 875            |
|                        | <i>Tetraodon nigroviridi</i>  | 21 220             | 231 206            |
| RNA-seq based          | Stringtie (Illumina)          | 23 844             | 741 156            |
|                        | Stringtie (Iso-seq)           | 11 771             | 94 293             |
|                        | PASA                          | 135 467            | 1 718 623          |
|                        | EVM Integration               | 29 497             | 256 599            |
|                        | PASA Update                   | 29 543             | 604 121            |

**Supplementary Table S14** BUSCO evaluation of predicted gene models of *S. chuatsi* and *S. scherzeri*

|                                 | <i>S. chuatsi</i> | <i>S. scherzeri</i> |
|---------------------------------|-------------------|---------------------|
| Complete BUSCOs                 | 3353 (92.1%)      | 3337 (91.7%)        |
| Complete and single-copy BUSCOs | 2136 (58.7%)      | 2158 (59.3%)        |
| Complete and duplicated BUSCOs  | 1217 (33.4%)      | 1179 (32.4%)        |
| Fragmented BUSCOs               | 44                | 73                  |
| Missing BUSCOs                  | 243               | 230                 |
| Total BUSCO groups searched     | 3640              | 3640                |

**Supplementary Table S15** Summary of gene functional annotations

|                    | <i>S. chuatsi</i>      | <i>S. scherzeri</i>    |
|--------------------|------------------------|------------------------|
| <b>Total</b>       | 29 278                 | 29 543                 |
| InterPro           | 25 507 (87.12%)        | 25 899 (87.67%)        |
| NCBI NR            | 23 064 (78.78%)        | 23 444 (79.36%)        |
| KEGG               | 16 119 (55.05%)        | 16 544 (56.00%)        |
| Swiss-Prot         | 20 051 (68.48%)        | 20 501(69.39%)         |
| eggNOG             | 20 796 (71.03%)        | 21 192 (71.73%)        |
| <b>Annotated</b>   | <b>26 623 (90.93%)</b> | <b>27 024 (91.47%)</b> |
| <b>Unannotated</b> | <b>2 655 (9.07%)</b>   | <b>2 519 (8.53%)</b>   |

**Supplementary Table S16** Summary of *S. chuatsi* and *S. scherzeri* individuals for resequencing

| Sample name | species             | Sampling site | Tissue of samples | Total bases (Gb) | Sequencing depth ( × ) |
|-------------|---------------------|---------------|-------------------|------------------|------------------------|
| SinChu1     | <i>S. chuatsi</i>   | Hunan         | Dorsal Fin        | 8.70             | 12.15                  |
| SinChu2     | <i>S. chuatsi</i>   | Hunan         | Dorsal Fin        | 9.53             | 13.31                  |
| SinChu3     | <i>S. chuatsi</i>   | Hunan         | Dorsal Fin        | 8.84             | 12.34                  |
| SinChu4     | <i>S. chuatsi</i>   | Hunan         | Dorsal Fin        | 8.19             | 11.43                  |
| SinChu5     | <i>S. chuatsi</i>   | Hunan         | Dorsal Fin        | 8.87             | 12.38                  |
| SinChu6     | <i>S. chuatsi</i>   | Hunan         | Dorsal Fin        | 8.59             | 12.00                  |
| SinSch1     | <i>S. scherzeri</i> | Jilin         | Dorsal Fin        | 8.14             | 11.37                  |
| SinSch2     | <i>S. scherzeri</i> | Jilin         | Dorsal Fin        | 8.69             | 12.13                  |
| SinSch3     | <i>S. scherzeri</i> | Jilin         | Dorsal Fin        | 8.36             | 11.67                  |
| SinSch4     | <i>S. scherzeri</i> | Jilin         | Muscle            | 9.89             | 13.80                  |
| SinSch5     | <i>S. scherzeri</i> | Jilin         | Muscle            | 10.04            | 14.02                  |
| SinSch6     | <i>S. scherzeri</i> | Jilin         | Muscle            | 9.54             | 13.32                  |
| SinSch7     | <i>S. scherzeri</i> | Guangdong     | Dorsal Fin        | 9.04             | 12.62                  |
| SinSch8     | <i>S. scherzeri</i> | Guangdong     | Dorsal Fin        | 9.57             | 13.36                  |
| SinSch9     | <i>S. scherzeri</i> | Guangdong     | Dorsal Fin        | 9.45             | 13.19                  |
| SinSch10    | <i>S. scherzeri</i> | Guangdong     | Dorsal Fin        | 9.33             | 13.02                  |
| SinSch11    | <i>S. scherzeri</i> | Guangdong     | Dorsal Fin        | 8.57             | 11.96                  |
| SinSch12    | <i>S. scherzeri</i> | Guangdong     | Dorsal Fin        | 8.57             | 11.96                  |

**Supplementary Table S17** Positively selected genes (PSGs) in *S. chuatsi*

| No. | Gene ID        | Gene Name                                                        | Abbreviation    | Omega  | P-value  |
|-----|----------------|------------------------------------------------------------------|-----------------|--------|----------|
| 1   | SinChu_g028183 | <i>phosphofructokinase, platelet</i>                             | <i>pfkp</i>     | 12.777 | 6.83E-12 |
| 2   | SinChu_g012873 | <i>Rap guanine nucleotide exchange factor (GEF) 3</i>            | <i>rapgef3</i>  | 1.543  | 9.17E-06 |
| 3   | SinChu_g008662 | <i>arrestin domain containing 3a</i>                             | <i>arrdc3a</i>  | 1      | 1.45E-05 |
| 4   | SinChu_g005846 | <i>sphingomyelin phosphodiesterase 3</i>                         | <i>smpd3</i>    | 1.963  | 1.92E-05 |
| 5   | SinChu_g005932 | <i>membrane-bound transcription factor peptidase, site 1</i>     | <i>mbtps1</i>   | 2.892  | 1.27E-04 |
| 6   | SinChu_g006396 | <i>tropomyosin 1</i>                                             | <i>tpm1</i>     | 37.621 | 1.53E-04 |
| 7   | SinChu_g014068 | <i>eukaryotic translation initiation factor 2-alpha kinase 3</i> | <i>EIF2AK3</i>  | 1.542  | 3.94E-04 |
| 8   | SinChu_g022725 | <i>ubiquitin carboxyl-terminal esterase L3</i>                   | <i>UCHL3</i>    | 1.603  | 2.71E-03 |
| 9   | SinChu_g019912 | <i>activation-induced cytidine deaminase</i>                     | <i>AICDA</i>    | 5.854  | 2.96E-03 |
| 10  | SinChu_g019441 | <i>chymotrypsinogen B</i>                                        | <i>CTRB</i>     | 1.632  | 5.49E-03 |
| 11  | SinChu_g022935 | <i>crystallin, gamma M3</i>                                      | <i>CRYGM3</i>   | 5.738  | 7.58E-03 |
| 12  | SinChu_g001073 | <i>titin-cap</i>                                                 | <i>TCAP</i>     | 5.131  | 7.83E-03 |
| 13  | SinChu_g016175 | <i>notch receptor 1</i>                                          | <i>NOTCH1</i>   | 2.341  | 8.93E-03 |
| 14  | SinChu_g004528 | <i>peroxiredoxin like 2B</i>                                     | <i>PRXL2B</i>   | 1.017  | 1.48E-02 |
| 15  | SinChu_g017335 | <i>solute carrier family 25 member 3a</i>                        | <i>SLC25A3A</i> | 2.022  | 4.56E-02 |

**Supplementary Table S18** Positively selected genes (PSGs) in *S. scherzeri*

| No | Gene ID        | Gene Name                                                                       | Abbreviation     | Omega  | P-value   |
|----|----------------|---------------------------------------------------------------------------------|------------------|--------|-----------|
| 1  | SinSch_g018173 | <i>Kin17 DNA and RNA binding protein</i>                                        | <i>kin</i>       | 16.209 | 2.032E-14 |
| 2  | SinSch_g027281 | <i>prolyl 4-hydroxylase, alpha polypeptide I a</i>                              | <i>p4ha1a</i>    | 14.815 | 1.32E-13  |
| 3  | SinSch_g004881 | <i>calcium channel, voltage-dependent, L type, alpha 1D subunit, a</i>          | <i>cacna1da</i>  | 3.126  | 1.63E-06  |
| 4  | SinSch_g015059 | <i>EYA transcriptional coactivator and phosphatase 4</i>                        | <i>eya4</i>      | 2.176  | 4.79E-06  |
| 5  | SinSch_g004606 | <i>mitogen-activated protein kinase 14b</i>                                     | <i>mapk14b</i>   | 10.548 | 1.79E-05  |
| 6  | SinSch_g021541 | <i>ribosomal protein S8b</i>                                                    | <i>rps8b</i>     | 5.625  | 2.52E-05  |
| 7  | SinSch_g021470 | <i>integrin, beta 1a</i>                                                        | <i>itgb1a</i>    | 1.786  | 2.57E-05  |
| 8  | SinSch_g004447 | <i>STIM activating enhance</i>                                                  | <i>stimate</i>   | 6.274  | 4.06E-05  |
| 9  | SinSch_g005151 | <i>cadherin 22</i>                                                              | <i>cdh22</i>     | 2.009  | 1.11E-04  |
| 10 | SinSch_g016577 | <i>syntaxin binding protein 1a</i>                                              | <i>stxbp1a</i>   | 3.702  | 8.13E-04  |
| 11 | SinSch_g004114 | <i>cell division cycle 42</i>                                                   | <i>cdc42</i>     | 1.487  | 9.01E-04  |
| 12 | SinSch_g015537 | <i>5'-3' exoribonuclease 2</i>                                                  | <i>xrn2</i>      | 1.457  | 1.40E-03  |
| 13 | SinSch_g002350 | <i>DENN domain containing 10</i>                                                | <i>dennd10</i>   | 3.309  | 3.15E-03  |
| 14 | SinSch_g007414 | <i>recombination signal binding protein for immunoglobulin kappa J region b</i> | <i>rbpjb</i>     | 10.465 | 3.89E-03  |
| 15 | SinSch_g010804 | <i>chloride channel, nucleotide-sensitive, 1A</i>                               | <i>clns1a</i>    | 1.226  | 4.74E-03  |
| 16 | SinSch_g001009 | <i>solute carrier family 25 member 17</i>                                       | <i>slc25a17</i>  | 3.178  | 5.36E-03  |
| 17 | SinSch_g021912 | <i>ring finger and CCCH-type domains 1b</i>                                     | <i>rc3h1b</i>    | 1.265  | 5.39E-03  |
| 18 | SinSch_g007217 | <i>protein phosphatase 1, regulatory (inhibitor) subunit 14Bb</i>               | <i>ppp1r14bb</i> | 8.416  | 5.82E-03  |

|    |                |                                                                            |               |        |          |
|----|----------------|----------------------------------------------------------------------------|---------------|--------|----------|
| 19 | SinSch_g003579 | <i>N-acetylneuraminic acid synthase a</i>                                  | <i>nansa</i>  | 7.354  | 6.93E-03 |
| 20 | SinSch_g027795 | <i>elongin B</i>                                                           | <i>elob</i>   | 26.514 | 1.03E-02 |
| 21 | SinSch_g010515 | <i>proteasome 20S subunit beta 4</i>                                       | <i>psmb4</i>  | 1.014  | 1.17E-02 |
| 22 | SinSch_g017936 | <i>ubiquitin-conjugating enzyme E2Nb</i>                                   | <i>ube2nb</i> | 13.274 | 1.51E-02 |
| 23 | SinSch_g001810 | <i>protein phosphatase, Mg<sup>2+</sup>/Mn<sup>2+</sup> dependent, 1Ba</i> | <i>ppm1ba</i> | 1.737  | 1.66E-02 |
| 24 | SinSch_g008885 | <i>bri3 binding protein</i>                                                | <i>bri3bp</i> | 4.148  | 2.38E-02 |
| 25 | SinSch_g014370 | <i>attractin</i>                                                           | <i>atrn</i>   | 2.439  | 4.54E-02 |

---



**Supplementary Table S19** Summary of sequencing and peak calling of CUT&Tag

|               | Species             | Mapped pair-<br>reads | Mapping<br>rate | PCR<br>repeat<br>rate | Uniquely<br>mapped reads | Number of<br>peaks | Average length of<br>peaks (bp) | FRiPs  |
|---------------|---------------------|-----------------------|-----------------|-----------------------|--------------------------|--------------------|---------------------------------|--------|
| H3K27ac       | <i>S. chuatsi</i>   | 22 383 313            | 97.90%          | 86.62%                | 2 762 865                | 17,015             | 789.66                          | 66.05% |
|               | <i>S. scherzeri</i> | 25 938 076            | 96.18%          | 80.85%                | 3 655 502                | 15,150             | 742.97                          | 69.99% |
| H3K4me3       | <i>S. chuatsi</i>   | 52 063 564            | 95.14%          | 73.09%                | 13 173 930               | 16,955             | 1061.62                         | 77.32% |
|               | <i>S. scherzeri</i> | 25 585 943            | 93.21%          | 39.33%                | 13 785 016               | 16,239             | 1014.29                         | 72.05% |
| IgG (Control) | <i>S. chuatsi</i>   | 165 620               | 26.77%          | 96.07%                | 2 627                    | 2                  | 329.50                          | 2.00%  |
|               | <i>S. scherzeri</i> | 451 411               | 55.46%          | 95.91%                | 7 697                    | 4                  | 322.00                          | 0.22%  |

**Supplementary Table S20** Summary of sequencing and peak calling of ATAC-Seq

| Sample | Species             | Mapped pair-<br>reads | Mapping<br>rate | PCR<br>repeat<br>rate | Uniquely<br>mapped reads | Number of<br>peaks | Average length of<br>peaks (bp) | FRiPs  |
|--------|---------------------|-----------------------|-----------------|-----------------------|--------------------------|--------------------|---------------------------------|--------|
| Chu1   | <i>S. chuatsi</i>   | 91 891 999            | 97.29%          | 25.10%                | 61 507 958               | 140 942            | 371.16                          | 22.13% |
| Chu2   | <i>S. chuatsi</i>   | 75 938 882            | 97.35%          | 22.29%                | 52 783 582               | 133 094            | 362.69                          | 21.14% |
| Sch1   | <i>S. scherzeri</i> | 67 435 897            | 93.63%          | 18.70%                | 40 670 224               | 172 513            | 267.22                          | 18.72% |
| Sch2   | <i>S. scherzeri</i> | 62 998 480            | 94.40%          | 15.77%                | 39 595 802               | 161 158            | 306.56                          | 20.62% |

**Supplementary Table S21** Summary of *cis*-regulatory regions identified in the genomes of *S. chuatsi* and *S. scherzeri*

|                     | Distal enhancers |         | Promoters |                 | Non-redundant <i>cis</i> -regulatory regions |
|---------------------|------------------|---------|-----------|-----------------|----------------------------------------------|
|                     | H3K27ac          | H3K4me3 | H3K27ac   | Total promoters |                                              |
| <i>S. chuatsi</i>   | 4 965            | 16 953  | 12 048    | 17 623          | 22 588                                       |
| <i>S. scherzeri</i> | 3 132            | 16 239  | 11 164    | 16 726          | 19 858                                       |

**Supplementary Table S22** Differentially expressed immune genes associated with *cis*-regulatory regions affected by SVs

| Gene ID        | Abbreviation   | Gene name                                               | Ortholog<br>in Human | log2FC<br>(H3K27ac<br>Peak Intensity) | FPKM (Spleen)     |                     |
|----------------|----------------|---------------------------------------------------------|----------------------|---------------------------------------|-------------------|---------------------|
|                |                |                                                         |                      |                                       | <i>S. chuatsi</i> | <i>S. scherzeri</i> |
| SinChu_g011534 | <i>prss16</i>  | <i>serine protease 16</i>                               | <i>PRSS16</i>        | -1.93689                              | 27.62             | 71.85               |
| SinChu_g015362 | <i>lama4</i>   | <i>laminin, alpha 4</i>                                 | <i>LAMA4</i>         | -1.15982                              | 2.2               | 30.09               |
| SinChu_g020408 | <i>cd22</i>    | <i>cd22 molecule</i>                                    | <i>CD22</i>          | -1.58585                              | 0.63              | 1.66                |
| SinChu_g027583 | <i>tecpr1b</i> | <i>tectonin beta-propeller repeat containing<br/>1b</i> | <i>TECPR1</i>        | -9.46312                              | 1.27              | 3.86                |

**Supplementary Table S23** Characterization of broad H3K4me3 peaks

|                     | Number of broad peaks | H3K27ac peaks |            |
|---------------------|-----------------------|---------------|------------|
|                     |                       | Overlap       | Percentage |
| <i>S. chuatsi</i>   | 491                   | 459           | 93.50%     |
| <i>S. scherzeri</i> | 481                   | 444           | 92.30%     |

**Supplementary Table S24** Summary of top 20 enriched KEGG pathways of genes associated with differential broad H3K4me3 peaks

|    | <b>Pathway ID</b> | <b>Pathway</b>                                  | <b>Candidate genes<br/>with pathway<br/>annotation</b> | <b>All genes with<br/>pathway<br/>annotation</b> | <b><i>P</i>-value</b> | <b>Q-value</b> |
|----|-------------------|-------------------------------------------------|--------------------------------------------------------|--------------------------------------------------|-----------------------|----------------|
| 1  | ko04072           | Phospholipase D signaling pathway               | 10 (12.5%)                                             | 144 (2.29%)                                      | 0.000012              | 0.002434       |
| 2  | ko05206           | MicroRNAs in cancer                             | 8 (10%)                                                | 134 (2.13%)                                      | 0.000275              | 0.027607       |
| 3  | ko05200           | Pathways in cancer                              | 15 (18.75%)                                            | 454 (7.22%)                                      | 0.000501              | 0.03359        |
| 4  | ko04910           | Insulin signaling pathway                       | 7 (8.75%)                                              | 139 (2.21%)                                      | 0.001833              | 0.0729         |
| 5  | ko04151           | PI3K-Akt signaling pathway                      | 11 (13.75%)                                            | 318 (5.06%)                                      | 0.002123              | 0.0729         |
| 6  | ko05231           | Choline metabolism in cancer                    | 6 (7.5%)                                               | 106 (1.69%)                                      | 0.002176              | 0.0729         |
| 7  | ko05222           | Small cell lung cancer                          | 5 (6.25%)                                              | 76 (1.21%)                                       | 0.002678              | 0.076894       |
| 8  | ko05221           | Acute myeloid leukemia                          | 4 (5%)                                                 | 50 (0.79%)                                       | 0.003585              | 0.079814       |
| 9  | ko04218           | Cellular senescence                             | 7 (8.75%)                                              | 157 (2.5%)                                       | 0.003645              | 0.079814       |
| 10 | ko05202           | Transcriptional misregulation in cancers        | 7 (8.75%)                                              | 165 (2.62%)                                      | 0.004791              | 0.079814       |
| 11 | ko04211           | Longevity regulating pathway - mammal           | 5 (6.25%)                                              | 87 (1.38%)                                       | 0.004806              | 0.079814       |
| 12 | ko04015           | Rap1 signaling pathway                          | 8 (10%)                                                | 210 (3.34%)                                      | 0.00497               | 0.079814       |
| 13 | ko05310           | Asthma                                          | 3 (3.75%)                                              | 28 (0.45%)                                       | 0.005162              | 0.079814       |
| 14 | ko04213           | Longevity regulating pathway - multiple species | 4 (5%)                                                 | 60 (0.95%)                                       | 0.006899              | 0.099043       |
| 15 | ko05230           | Central carbon metabolism in cancer             | 4 (5%)                                                 | 62 (0.99%)                                       | 0.007742              | 0.101914       |
| 16 | ko05169           | Epstein-Barr virus infection                    | 7 (8.75%)                                              | 182 (2.89%)                                      | 0.008113              | 0.101914       |
| 17 | ko05163           | Human cytomegalovirus infection                 | 7 (8.75%)                                              | 189 (3%)                                         | 0.009887              | 0.116899       |
| 18 | ko05162           | Measles                                         | 5 (6.25%)                                              | 114 (1.81%)                                      | 0.014648              | 0.163572       |
| 19 | ko04630           | Jak-STAT signaling pathway                      | 5 (6.25%)                                              | 120 (1.91%)                                      | 0.017933              | 0.186168       |
| 20 | ko04152           | AMPK signaling pathway                          | 5 (6.25%)                                              | 121 (1.92%)                                      | 0.018524              | 0.186168       |

**Supplementary Table S25** Differential broad H3K4me3 peaks associated genes that are enriched in pathways in cancer (ko05200)

| Gene ID        | Abbreviation  | Gene Name                                                      | Ortholog in Human | log2FC (Broad H3K4me3 Intensity) | log2FC (Gene Expression Level) |
|----------------|---------------|----------------------------------------------------------------|-------------------|----------------------------------|--------------------------------|
| SinChu_g011111 | <i>egln2</i>  | <i>egl-9 family hypoxia-inducible factor 2</i>                 | <i>EGLN2</i>      | 1.17304                          | 2.23113776                     |
| SinChu_g008717 | <i>f2r</i>    | <i>coagulation factor II (thrombin) receptor</i>               | <i>F2R</i>        | 2.08824                          | 3.19522938                     |
| SinChu_g023426 | <i>kita</i>   | <i>KIT proto-oncogene, receptor tyrosine kinase a</i>          | <i>KIT</i>        | 3.00812                          | 4.68452923                     |
| SinChu_g001477 | <i>ncoa4</i>  | <i>nuclear receptor coactivator 4</i>                          | <i>NCOA4</i>      | 1.19068                          | 2.291397069                    |
| SinChu_g017824 | <i>ccnd2a</i> | <i>cyclin D2, a</i>                                            | <i>CCND2</i>      | 1.90242                          | 1.93104124                     |
| SinChu_g022510 | <i>cyc1</i>   | <i>cytochrome c-1</i>                                          | <i>CYC1</i>       | -2.17504                         | -6.141871664                   |
| SinChu_g010322 | <i>e2f3</i>   | <i>E2F transcription factor 3</i>                              | <i>E2F3</i>       | -1.47952                         | -2.294534034                   |
| SinChu_g016271 | <i>pik3r1</i> | <i>phosphoinositide-3-kinase, regulatory subunit 1 (alpha)</i> | <i>PIK3R1</i>     | -1.92386                         | -1.4228252                     |
